# Supplementary material
Source: publisher figshare collection journal article supplement (https://diabetesjournals.figshare.com/articles/dataset/_/13102979)
Supplement: Supplementary file 2 [file 1]

**Supplementary Table 1.** Basic characteristics of subset 1 (AF Baseline) of the ADVANCE cohort at baseline, patients identified to not have AF and those identified to have AF.

| Variable                                     | Variable                                                                       | All (n=3,772)     | Non AF (n=3,368)  | AF (n=404)        | P-value         |
|----------------------------------------------|--------------------------------------------------------------------------------|-------------------|-------------------|-------------------|-----------------|
| <b>Continuous variables, median (Q1, Q3)</b> |                                                                                |                   |                   |                   |                 |
| AGE*                                         | Age, years                                                                     | 67 (62, 72)       | 67 (62,71)        | 69 (65, 74)       | <b>4.42E-08</b> |
| WEIGHT*                                      | Weight, kg                                                                     | 83 (74, 94)       | 83 (73, 94)       | 85 (75, 97)       | <b>5.41E-03</b> |
| BMI                                          | Body mass index                                                                | 29.4 (26.5, 32.9) | 29.4 (26.5, 32.8) | 29.7 (26.5, 33.3) | 1.89E-01        |
| HEIGHT*                                      | Height, cm                                                                     | 168 (161, 175)    | 168 (160, 175)    | 169 (163, 175)    | <b>8.67E-03</b> |
| SBP*                                         | Systolic blood pressure                                                        | 146 (133, 160)    | 146 (133, 160)    | 146 (135, 162)    | 2.82E-01        |
| DBP*                                         | Diastolic blood pressure                                                       | 81 (74, 89)       | 81 (74, 89)       | 82 (74, 91)       | 2.20E-01        |
| TOTAL_CHOL*                                  | Total cholesterol (mmol/l)                                                     | 5.00 (4.30, 5.81) | 5.02 (4.30, 5.88) | 4.90 (4.20, 5.60) | <b>2.35E-02</b> |
| HDL_CHOL*                                    | HDL cholesterol (mmol/l)                                                       | 1.20 (1.00, 1.40) | 1.20 (1.00, 1.40) | 1.16 (1.00, 1.40) | 1.77E-01        |
| LDL_CHOL                                     | LDL cholesterol (mmol/l)                                                       | 3.00 (2.35, 3.70) | 3.00 (2.32, 3.74) | 2.90 (2.40, 3.60) | 2.72E-01        |
| TRIGLYC*                                     | Triglycerides (mmol/l)                                                         | 1.70 (1.20, 2.36) | 1.70 (1.20, 2.35) | 1.60 (1.11, 2.36) | 6.74E-02        |
| GLUCOSE                                      | Blood glucose (mmol/l)                                                         | 7.9 (6.6, 9.8)    | 7.9 (6.6, 9.7)    | 7.8 (6.6, 10.0)   | 7.87E-01        |
| HR                                           | Heart rate (bpm)                                                               | 72 (64, 80)       | 72 (64, 80)       | 72 (62, 81)       | 9.87E-01        |
| <b>Dichotomous variables, n (%)</b>          |                                                                                |                   |                   |                   |                 |
| SEX                                          | Sex (males)                                                                    | 2303 (61.1)       | 2065 (61.3)       | 238 (58.9)        | 3.78E-01        |
| Q_WAVES*                                     | Myocardial Infarction                                                          | 455 (12.1)        | 394 (11.7)        | 61 (15.1)         | 5.71E-02        |
| Antihypertensive*                            | Antihypertensive medication used                                               | 3016 (80.0)       | 2647 (78.6)       | 369 (91.3)        | <b>2.22E-09</b> |
| Smoking*                                     | Currently Smoking                                                              | 563 (14.9)        | 518 (15.4)        | 45 (11.1)         | <b>2.88E-02</b> |
| HF*                                          | Hospital admission for heart failure                                           | 175 (4.6)         | 113 (3.4)         | 62 (15.3)         | <b>9.88E-27</b> |
| CABG                                         | Coronary artery bypass graft or percutaneous transluminal coronary angioplasty | 455 (12.1)        | 405 (12)          | 50 (12.4)         | 9.01E-01        |

\*Covariates used in association studies and multivariable models i.e. age, weight, height, systolic blood pressure (SBP), diastolic blood pressure (DBP), total cholesterol (TOTAL\_CHOL), HDL cholesterol (HDL\_CHOL), triglycerides (TRIGLYC), myocardial infarction (Q\_WAVES), antihypertensive medication used, current smoking status, and hospital admission for heart failure (HF). For continuous variables, Mann Whitney U-test was used. For categorical variables, Chi-squared test was used.

**Supplementary Table 2.** Basic characteristics of subset 2 (AF Future) of the ADVANCE cohort, patients identified to not have AF at baseline and at future follow-up time points, and those identified to not have AF at baseline, but developed AF at a future time point(s).

| Variable                                     | Variable                                                                       | All (n=2,238)     | Non AF (n=2,054)  | AF Future (n=184) | P-value         |
|----------------------------------------------|--------------------------------------------------------------------------------|-------------------|-------------------|-------------------|-----------------|
| <b>Continuous variables, median (Q1, Q3)</b> |                                                                                |                   |                   |                   |                 |
| AGE*                                         | Age, years                                                                     | 66 (61, 71)       | 66 (61,70)        | 69 (65, 73)       | <b>1.56E-09</b> |
| WEIGHT*                                      | Weight, kg                                                                     | 83 (73, 94)       | 83 (73, 93)       | 85 (75, 100)      | <b>1.21E-02</b> |
| BMI                                          | Body mass index                                                                | 29.4 (26.6, 32.7) | 29.4 (26.5, 32.6) | 30.0 (27.6, 33.8) | <b>3.73E-03</b> |
| HEIGHT*                                      | Height, cm                                                                     | 168 (160, 175)    | 168 (160, 175)    | 167 (162, 174)    | 7.39E-01        |
| SBP*                                         | Systolic blood pressure                                                        | 145 (132, 160)    | 145 (132, 159)    | 150 (136, 166)    | <b>2.71E-03</b> |
| DBP*                                         | Diastolic blood pressure                                                       | 81 (75, 89)       | 82 (75, 89)       | 81 (75, 89)       | 8.12E-01        |
| TOTAL_CHOL*                                  | Total cholesterol (mmol/l)                                                     | 5.10 (4.40, 5.90) | 5.10 (4.40, 5.90) | 5.10 (4.32, 5.79) | 8.97E-01        |
| HDL_CHOL*                                    | HDL cholesterol (mmol/l)                                                       | 1.20 (1.00, 1.40) | 1.20 (1.00, 1.40) | 1.19 (1.00, 1.38) | 2.56E-01        |
| LDL_CHOL                                     | LDL cholesterol (mmol/l)                                                       | 3.00 (2.40, 3.80) | 3.00 (2.40, 3.80) | 3.00 (2.37, 3.80) | 8.95E-01        |
| TRIGLYC*                                     | Triglycerides (mmol/l)                                                         | 1.70 (1.20, 2.35) | 1.70 (1.20, 2.37) | 1.67 (1.20, 2.27) | 9.41E-01        |
| GLUCOSE                                      | Blood glucose (mmol/l)                                                         | 7.9 (6.5, 9.6)    | 7.9 (6.6, 9.6)    | 7.6 (6.5, 9.4)    | 2.67E-01        |
| HR                                           | Heart rate (bpm)                                                               | 72 (64, 80)       | 72 (64, 80)       | 70 (61, 77)       | <b>1.85E-03</b> |
| <b>Dichotomous variables, n (%)</b>          |                                                                                |                   |                   |                   |                 |
| SEX                                          | Sex (males)                                                                    | 1337 (59.7)       | 1224 (59.6)       | 113 (61.4)        | 6.86E-01        |
| Q_WAVES*                                     | Myocardial Infarction                                                          | 238 (10.6)        | 213 (10.4)        | 25 (13.6)         | 2.18E-01        |
| Antihypertensive*                            | Antihypertensive medication used                                               | 1746 (78.0)       | 1588 (77.3)       | 158 (85.9)        | <b>9.54E-03</b> |
| Smoking*                                     | Currently Smoking                                                              | 317 (14.2)        | 309 (15.0)        | 8 (4.3)           | <b>1.06E-04</b> |
| HF*                                          | Hospital admission for heart failure                                           | 57 (2.5)          | 45 (2.2)          | 12 (6.5)          | <b>8.74E-04</b> |
| CABG                                         | Coronary artery bypass graft or percutaneous transluminal coronary angioplasty | 261 (11.7%)       | 238 (11.6%)       | 23 (12.5%)        | 8.03E-01        |

\*Covariates used in association studies and multivariable models. For continuous variables, Mann Whitney U-test was used. For categorical variables, Chi-squared test was used.

**Supplementary Table 3.** Basic characteristics of Non AF patients from cohort 1 vs patients from cohort 2.

| Variable                                     | Variable                                                                       | Cohort 1 (n=3,368) | Cohort 2 (n=2,238) | P-value         |
|----------------------------------------------|--------------------------------------------------------------------------------|--------------------|--------------------|-----------------|
| <b>Continuous variables, median (Q1, Q3)</b> |                                                                                |                    |                    |                 |
| AGE*                                         | Age, years                                                                     | 67 (62,71)         | 66 (61, 71)        | <b>2.51E-05</b> |
| WEIGHT*                                      | Weight, kg                                                                     | 83 (73, 94)        | 83 (73, 94)        | 9.91E-01        |
| BMI                                          | Body mass index                                                                | 29.4 (26.5, 32.8)  | 29.4 (26.6, 32.7)  | 7.29E-01        |
| HEIGHT*                                      | Height, cm                                                                     | 168 (160, 175)     | 168 (160, 175)     | 6.75E-01        |
| SBP*                                         | Systolic blood pressure                                                        | 146 (133, 160)     | 145 (132, 160)     | 3.56E-01        |
| DBP*                                         | Diastolic blood pressure                                                       | 81 (74, 89)        | 81 (75, 89)        | 4.20E-01        |
| TOTAL_CHOL*                                  | Total cholesterol (mmol/l)                                                     | 5.02 (4.30, 5.88)  | 5.1 (4.40, 5.90)   | 2.59E-01        |
| HDL_CHOL*                                    | HDL cholesterol (mmol/l)                                                       | 1.20 (1.00, 1.40)  | 1.20 (1.00, 1.40)  | 4.68E-01        |
| LDL_CHOL                                     | LDL cholesterol (mmol/l)                                                       | 3.00 (2.32, 3.74)  | 3.00 (2.40, 3.80)  | 2.86E-01        |
| TRIGLYC*                                     | Triglycerides (mmol/l)                                                         | 1.7 (1.20, 2.35)   | 1.70 (1.20, 2.35)  | 9.62E-01        |
| GLUCOSE                                      | Blood glucose (mmol/l)                                                         | 7.9 (6.6, 9.7)     | 7.9 (6.5, 9.6)     | 3.58E-01        |
| HR                                           | Heart rate (bpm)                                                               | 72 (64, 80)        | 72 (64, 80)        | 4.21E-01        |
| <b>Dichotomous variables, n (%)</b>          |                                                                                |                    |                    |                 |
| SEX                                          | Sex (males)                                                                    | 2065 (61.3)        | 1337 (59.7)        | 2.49E-01        |
| Q_WAVES*                                     | Myocardial Infarction                                                          | 394 (11.7)         | 238 (10.6)         | 2.34E-01        |
| Antihypertensive*                            | Antihypertensive medication used                                               | 2647 (78.6)        | 1746 (78.0)        | 6.31E-01        |
| Smoking*                                     | Currently Smoking                                                              | 317 (14.2)         | 835 (14.9)         | 2.25E-01        |
| HF*                                          | Hospital admission for heart failure                                           | 113 (3.4)          | 57 (2.5)           | 9.92E-02        |
| CABG                                         | Coronary artery bypass graft or percutaneous transluminal coronary angioplasty | 405 (12)           | 261 (11.7)         | 7.12E-01        |

\*Covariates used in association studies and multivariable models. For continuous variables, Mann Whitney U-test was used. For categorical variables, Chi-squared test was used.

**Supplementary Table 4.** Odds ratios and p-values of plasma lipid species in ADVANCE subset 1 against the prevalence of AF

| lipid | Predictors                    | Odds Ratio | lower CI | upper CI | P-value         | Adjusted P-value (BH) |
|-------|-------------------------------|------------|----------|----------|-----------------|-----------------------|
| 1     | dhCer(d18:0/16:0)             | 1.1510     | 0.9994   | 1.3264   | 5.14E-02        | 1.67E-01              |
| 2     | dhCer(d18:0/18:0)             | 1.0905     | 0.9383   | 1.2636   | 2.54E-01        | 4.75E-01              |
| 3     | dhCer(d18:0/20:0)             | 0.9659     | 0.822    | 1.1351   | 6.74E-01        | 8.34E-01              |
| 4     | dhCer(d18:0/22:0)             | 0.9195     | 0.7831   | 1.0806   | 3.07E-01        | 5.20E-01              |
| 5     | dhCer(d18:0/24:0)             | 0.8564     | 0.7315   | 1.0024   | 5.36E-02        | 1.68E-01              |
| 6     | dhCer(d18:0/24:1)             | 0.7789     | 0.6756   | 0.8994   | <b>6.15E-04</b> | <b>9.78E-03</b>       |
| 7     | Cer(d18:1/16:0)               | 1.2378     | 1.0572   | 1.4529   | <b>8.52E-03</b> | 5.71E-02              |
| 8     | Cer(d18:1/18:0)               | 1.1731     | 1.0024   | 1.3753   | <b>4.79E-02</b> | 1.62E-01              |
| 9     | Cer(d18:1/20:0)               | 1.1378     | 0.9711   | 1.3370   | 1.14E-01        | 2.81E-01              |
| 10    | Cer(d18:1/22:0)               | 0.9441     | 0.8107   | 1.1037   | 4.65E-01        | 6.63E-01              |
| 11    | Cer(d18:1/24:0)               | 0.8015     | 0.6967   | 0.9247   | <b>2.18E-03</b> | <b>2.27E-02</b>       |
| 12    | Cer(d18:1/24:1)               | 1.3206     | 1.1276   | 1.5515   | <b>6.38E-04</b> | <b>9.78E-03</b>       |
| 13    | HexCer(d18:1/16:0)            | 1.2220     | 1.0428   | 1.4347   | <b>1.38E-02</b> | 8.07E-02              |
| 14    | HexCer(d18:1/18:0)            | 1.2939     | 1.1054   | 1.5174   | <b>1.43E-03</b> | <b>1.70E-02</b>       |
| 15    | HexCer(d18:1/20:0)            | 1.3226     | 1.1257   | 1.5574   | <b>7.33E-04</b> | <b>1.03E-02</b>       |
| 16    | HexCer(d18:1/22:0)            | 1.1346     | 0.9668   | 1.3333   | 1.24E-01        | 3.02E-01              |
| 17    | HexCer(d18:1/24:0)            | 1.0982     | 0.9299   | 1.2987   | 2.72E-01        | 4.94E-01              |
| 18    | HexCer(d18:1/24:1)            | 1.4850     | 1.2601   | 1.7525   | <b>2.60E-06</b> | <b>4.19E-04</b>       |
| 19    | Hex2Cer(d18:1/16:0)           | 1.3906     | 1.1877   | 1.6307   | <b>4.54E-05</b> | <b>1.33E-03</b>       |
| 20    | Hex2Cer(d18:1/18:0)           | 1.4067     | 1.2130   | 1.6362   | <b>7.83E-06</b> | <b>5.26E-04</b>       |
| 21    | Hex2Cer(d18:1/20:0)           | 1.3508     | 1.1722   | 1.5600   | <b>3.72E-05</b> | <b>1.33E-03</b>       |
| 22    | Hex2Cer(d18:1/22:0)           | 1.4001     | 1.2055   | 1.6273   | <b>1.10E-05</b> | <b>5.26E-04</b>       |
| 23    | Hex2Cer(d18:1/24:0)           | 1.2636     | 1.0873   | 1.4691   | <b>2.30E-03</b> | <b>2.31E-02</b>       |
| 24    | Hex2Cer(d18:1/24:1)           | 1.4981     | 1.2785   | 1.7575   | <b>6.35E-07</b> | <b>2.04E-04</b>       |
| 25    | Hex3Cer(d18:1/16:0)           | 0.9761     | 0.9097   | 1.0436   | 4.88E-01        | 6.79E-01              |
| 26    | Hex3Cer(d18:1/18:0)           | 1.0395     | 0.8905   | 1.2152   | 6.25E-01        | 7.93E-01              |
| 27    | Hex3Cer(d18:1/20:0)           | 1.1830     | 1.0218   | 1.3751   | <b>2.65E-02</b> | 1.20E-01              |
| 28    | Hex3Cer(d18:1/22:0)           | 1.1487     | 0.9828   | 1.3453   | 8.35E-02        | 2.30E-01              |
| 29    | Hex3Cer(d18:1/24:0)           | 1.0338     | 0.8873   | 1.2063   | 6.71E-01        | 8.34E-01              |
| 30    | Hex3Cer(d18:1/24:1)           | 1.3210     | 1.1212   | 1.5584   | <b>9.19E-04</b> | <b>1.23E-02</b>       |
| 31    | GM3(d18:1/16:0)               | 1.2296     | 1.0432   | 1.4537   | <b>1.46E-02</b> | 8.41E-02              |
| 32    | GM3(d18:1/18:0)               | 0.9612     | 0.8451   | 1.095    | 5.49E-01        | 7.27E-01              |
| 33    | GM3(d18:1/20:0)               | 0.8715     | 0.7635   | 0.9957   | <b>4.23E-02</b> | 1.53E-01              |
| 34    | GM3(d18:1/22:0)               | 0.9418     | 0.8253   | 1.0762   | 3.75E-01        | 5.80E-01              |
| 35    | GM3(d18:1/24:0)               | 0.9287     | 0.8126   | 1.0628   | 2.80E-01        | 5.02E-01              |
| 36    | GM3(d18:1/24:1)               | 0.9662     | 0.8447   | 1.1059   | 6.16E-01        | 7.87E-01              |
| 37    | SM(d17:1/14:0)                | 0.9770     | 0.8371   | 1.1424   | 7.70E-01        | 8.72E-01              |
| 38    | SM(d18:0/14:0)                | 0.9730     | 0.8317   | 1.1408   | 7.35E-01        | 8.66E-01              |
| 39    | SM(d18:1/14:0)/SM(d16:1/16:0) | 0.9951     | 0.8495   | 1.1707   | 9.53E-01        | 9.72E-01              |
| 40    | SM(d18:2/14:0)                | 0.9922     | 0.8370   | 1.1793   | 9.28E-01        | 9.60E-01              |
| 41    | SM(d17:1/16:0)                | 1.1057     | 0.9515   | 1.2891   | 1.95E-01        | 4.18E-01              |
| 42    | SM(d18:0/16:0)                | 1.0920     | 0.9356   | 1.2761   | 2.67E-01        | 4.89E-01              |
| 43    | SM(d18:1/16:0)                | 1.0542     | 0.9036   | 1.2327   | 5.06E-01        | 6.93E-01              |
| 44    | SM(d18:2/16:0)                | 1.1426     | 0.9589   | 1.3698   | 1.43E-01        | 3.39E-01              |
| 45    | SM(34:3)                      | 0.9464     | 0.8181   | 1.0984   | 4.64E-01        | 6.63E-01              |
| 46    | SM(35:1)                      | 1.0908     | 0.9415   | 1.2676   | 2.52E-01        | 4.75E-01              |
| 47    | SM(35:2)                      | 1.0677     | 0.9193   | 1.2464   | 3.99E-01        | 6.07E-01              |
| 48    | SM(d18:1/18:0)/SM(d16:1/20:0) | 1.0263     | 0.8833   | 1.1945   | 7.37E-01        | 8.66E-01              |
| 49    | SM(d18:2/18:0)                | 1.0350     | 0.8841   | 1.2174   | 6.73E-01        | 8.34E-01              |
| 50    | SM(d18:2/18:1)                | 0.8945     | 0.7765   | 1.0322   | 1.25E-01        | 3.02E-01              |
| 51    | SM(d18:1/20:0)/SM(d16:1/22:0) | 0.8805     | 0.7615   | 1.0219   | 8.98E-02        | 2.41E-01              |
| 52    | SM(d18:2/20:0)                | 1.0545     | 0.9086   | 1.2286   | 4.91E-01        | 6.79E-01              |
| 53    | SM(d16:1/23:0)/SM(d17:1/22:0) | 0.9001     | 0.7822   | 1.0384   | 1.45E-01        | 3.39E-01              |
| 54    | SM(41:1)                      | 0.8722     | 0.7517   | 1.0138   | 7.31E-02        | 2.13E-01              |
| 55    | SM(41:2)                      | 0.9697     | 0.8320   | 1.1337   | 6.97E-01        | 8.53E-01              |
| 56    | SM(d18:1/24:0)                | 0.7313     | 0.6287   | 0.8508   | <b>5.01E-05</b> | <b>1.34E-03</b>       |
| 57    | PC(29:0)                      | 1.2140     | 1.0483   | 1.4065   | <b>9.71E-03</b> | 6.13E-02              |

|     |                                |        |        |        |                 |                 |
|-----|--------------------------------|--------|--------|--------|-----------------|-----------------|
| 58  | PC(31:0)                       | 1.1027 | 0.9482 | 1.2844 | 2.07E-01        | 4.22E-01        |
| 59  | PC (31:1)                      | 1.0677 | 0.9169 | 1.2479 | 4.05E-01        | 6.10E-01        |
| 60  | PC(33:0)                       | 1.1650 | 1.0025 | 1.3566 | <b>4.78E-02</b> | 1.62E-01        |
| 61  | PC(33:1)                       | 1.1373 | 0.9733 | 1.3315 | 1.07E-01        | 2.73E-01        |
| 62  | PC(33:2)                       | 0.9513 | 0.8199 | 1.1061 | 5.13E-01        | 7.01E-01        |
| 63  | PC (33:3)                      | 1.0246 | 0.8876 | 1.1848 | 7.42E-01        | 8.66E-01        |
| 64  | PC (35:0)                      | 1.0746 | 0.9242 | 1.2522 | 3.53E-01        | 5.65E-01        |
| 65  | PC(35:1)                       | 0.9939 | 0.8569 | 1.1560 | 9.36E-01        | 9.60E-01        |
| 66  | PC(35:2)                       | 1.0164 | 0.8794 | 1.1787 | 8.27E-01        | 8.94E-01        |
| 67  | PC(35:3)                       | 1.0179 | 0.8800 | 1.1817 | 8.14E-01        | 8.93E-01        |
| 68  | PC(15:0_20:4)                  | 0.8557 | 0.7470 | 0.9826 | <b>2.58E-02</b> | 1.19E-01        |
| 69  | PC(15-MHDA_20:4)\PC(17:0_20:4) | 0.8979 | 0.7887 | 1.0269 | 1.10E-01        | 2.73E-01        |
| 70  | PC(37:5)                       | 0.9387 | 0.8437 | 1.0527 | 2.62E-01        | 4.86E-01        |
| 71  | PC(15:0_22:6)                  | 0.9285 | 0.8110 | 1.0653 | 2.86E-01        | 5.06E-01        |
| 72  | PC(39:5)                       | 0.9053 | 0.7967 | 1.0338 | 1.35E-01        | 3.23E-01        |
| 73  | PC(39:6)                       | 0.9215 | 0.8051 | 1.0571 | 2.39E-01        | 4.55E-01        |
| 74  | PC(39:7)                       | 0.9301 | 0.8054 | 1.0750 | 3.25E-01        | 5.37E-01        |
| 75  | PC(28:0)                       | 0.9799 | 0.8480 | 1.1320 | 7.82E-01        | 8.73E-01        |
| 76  | PC(14:0_16:0)                  | 1.0133 | 0.8678 | 1.1844 | 8.67E-01        | 9.22E-01        |
| 77  | PC(16:0_16:0)                  | 1.1558 | 0.9920 | 1.3494 | 6.51E-02        | 1.94E-01        |
| 78  | PC(32:1)                       | 1.0289 | 0.8753 | 1.2110 | 7.31E-01        | 8.66E-01        |
| 79  | PC(32:2)                       | 0.8955 | 0.7604 | 1.0594 | 1.92E-01        | 4.15E-01        |
| 80  | PC(32:3)                       | 0.9143 | 0.8051 | 1.0443 | 1.75E-01        | 3.92E-01        |
| 81  | PC(16:0_18:0)                  | 1.0466 | 0.8904 | 1.2344 | 5.85E-01        | 7.66E-01        |
| 82  | PC(16:0_18:1)                  | 1.0905 | 0.9305 | 1.2821 | 2.89E-01        | 5.06E-01        |
| 83  | PC(16:0_18:2)                  | 0.9939 | 0.8610 | 1.1518 | 9.34E-01        | 9.60E-01        |
| 84  | PC(16:1_18:2)\PC(16:0_18:3)    | 0.9778 | 0.8391 | 1.1431 | 7.76E-01        | 8.73E-01        |
| 85  | PC(14:0_20:4)                  | 0.8039 | 0.6971 | 0.9295 | <b>2.93E-03</b> | <b>2.55E-02</b> |
| 86  | PC(34:5)                       | 0.9802 | 0.8519 | 1.1299 | 7.81E-01        | 8.73E-01        |
| 87  | PC(36:0)                       | 0.9902 | 0.8518 | 1.1547 | 8.99E-01        | 9.44E-01        |
| 88  | PC(18:0_18:1)                  | 1.0229 | 0.8703 | 1.2059 | 7.86E-01        | 8.73E-01        |
| 89  | PC(36:2)                       | 1.0414 | 0.8928 | 1.2215 | 6.12E-01        | 7.87E-01        |
| 90  | PC(18:1_18:2)\PC(16:0_20:3)    | 0.9041 | 0.7745 | 1.0605 | 2.08E-01        | 4.22E-01        |
| 91  | PC(18:2_18:2)\PC(16:0_20_4)    | 0.7681 | 0.6365 | 0.9279 | <b>6.03E-03</b> | <b>4.52E-02</b> |
| 92  | PC(36:5)                       | 1.1958 | 0.9775 | 1.4630 | 8.21E-02        | 2.28E-01        |
| 93  | PC(18:0_20:3)                  | 0.9307 | 0.7974 | 1.0901 | 3.68E-01        | 5.73E-01        |
| 94  | PC(38:4)                       | 0.8497 | 0.7439 | 0.9742 | <b>1.79E-02</b> | 9.46E-02        |
| 95  | PC(38:5)                       | 0.8703 | 0.7622 | 0.9973 | <b>4.29E-02</b> | 1.53E-01        |
| 96  | PC(38:6)                       | 0.8997 | 0.7877 | 1.0297 | 1.22E-01        | 2.99E-01        |
| 97  | PC(38:7)                       | 0.9493 | 0.8274 | 1.0915 | 4.61E-01        | 6.63E-01        |
| 98  | PC(18:0_22:4)\PC(20:0_20:4)    | 0.8490 | 0.7336 | 0.9849 | <b>2.94E-02</b> | 1.26E-01        |
| 99  | PC(18:0_22:5)                  | 0.8639 | 0.7524 | 0.9951 | <b>4.01E-02</b> | 1.53E-01        |
| 100 | PC(18:0_22:6)                  | 0.9308 | 0.8141 | 1.0667 | 2.98E-01        | 5.11E-01        |
| 101 | PC(40:7)                       | 0.8674 | 0.7621 | 0.9898 | <b>3.28E-02</b> | 1.34E-01        |
| 102 | PC(40:8)                       | 0.8589 | 0.7435 | 0.9950 | <b>4.07E-02</b> | 1.53E-01        |
| 103 | PC(O-16:0/16:0)                | 1.2613 | 1.0924 | 1.4583 | <b>1.63E-03</b> | <b>1.87E-02</b> |
| 104 | PC(O-32:1)                     | 1.3932 | 1.2036 | 1.6144 | <b>9.54E-06</b> | <b>5.26E-04</b> |
| 105 | PC(O-32:2)                     | 1.2077 | 1.0637 | 1.3700 | <b>3.45E-03</b> | <b>2.92E-02</b> |
| 106 | PC(O-34:1)                     | 1.3078 | 1.1227 | 1.5270 | <b>6.26E-04</b> | <b>9.78E-03</b> |
| 107 | PC(O-34:2)                     | 1.0563 | 0.9151 | 1.2202 | 4.56E-01        | 6.61E-01        |
| 108 | PC(O-34:3)                     | 1.1498 | 0.9955 | 1.3292 | 5.82E-02        | 1.77E-01        |
| 109 | PC(O-34:4)                     | 1.0847 | 0.9360 | 1.2576 | 2.81E-01        | 5.02E-01        |
| 110 | PC(O-35:4)                     | 1.0564 | 0.9066 | 1.2346 | 4.86E-01        | 6.79E-01        |
| 111 | PC(O-36:0)                     | 1.0845 | 0.9608 | 1.2235 | 1.88E-01        | 4.09E-01        |
| 112 | PC(O-36:1)                     | 1.3007 | 1.1124 | 1.5243 | <b>1.07E-03</b> | <b>1.38E-02</b> |
| 113 | PC(O-36:2)                     | 1.1872 | 1.0222 | 1.3821 | <b>2.57E-02</b> | 1.19E-01        |
| 114 | PC(O-36:3)                     | 1.1040 | 0.9510 | 1.2854 | 1.98E-01        | 4.21E-01        |
| 115 | PC(O-36:4)                     | 1.0022 | 0.8685 | 1.1591 | 9.76E-01        | 9.82E-01        |
| 116 | PC(O-36:5)                     | 1.1862 | 1.0323 | 1.3640 | <b>1.63E-02</b> | 9.03E-02        |
| 117 | PC(O-18:0/20:4)                | 1.0167 | 0.8823 | 1.1760 | 8.21E-01        | 8.93E-01        |
| 118 | PC(O-38:5)                     | 1.0438 | 0.9089 | 1.2032 | 5.49E-01        | 7.27E-01        |

|     |                 |        |        |        |                 |                 |
|-----|-----------------|--------|--------|--------|-----------------|-----------------|
| 119 | PC(O-40:5)      | 1.0316 | 0.8990 | 1.1886 | 6.62E-01        | 8.30E-01        |
| 120 | PC(O-18:0/22:6) | 1.0684 | 0.9270 | 1.2361 | 3.68E-01        | 5.73E-01        |
| 121 | PC(O-40:7)      | 1.0578 | 0.9198 | 1.2205 | 4.36E-01        | 6.47E-01        |
| 122 | PC(P-16:0/14:0) | 1.2020 | 1.0264 | 1.4085 | <b>2.27E-02</b> | 1.11E-01        |
| 123 | PC(P-16:0/16:0) | 1.2346 | 1.0607 | 1.4392 | <b>6.79E-03</b> | <b>4.86E-02</b> |
| 124 | PC(P-16:0/16:1) | 1.2324 | 1.0589 | 1.4362 | <b>7.16E-03</b> | <b>4.91E-02</b> |
| 125 | PC(P-16:0/18:1) | 1.4290 | 1.2049 | 1.6984 | <b>4.56E-05</b> | <b>1.33E-03</b> |
| 126 | PC(P-16:0/18:2) | 0.9750 | 0.8327 | 1.1438 | 7.55E-01        | 8.68E-01        |
| 127 | PC(P-16:0/18:3) | 0.9066 | 0.7777 | 1.0583 | 2.12E-01        | 4.27E-01        |
| 128 | PC(P-36:2)      | 1.1153 | 0.9564 | 1.3037 | 1.67E-01        | 3.80E-01        |
| 129 | PC(P-16:0/20:4) | 0.9756 | 0.8473 | 1.1264 | 7.33E-01        | 8.66E-01        |
| 130 | PC(P-16:0/20:5) | 1.1287 | 0.9826 | 1.2984 | 8.84E-02        | 2.39E-01        |
| 131 | PC(P-18:0/20:4) | 0.9569 | 0.8355 | 1.1024 | 5.33E-01        | 7.15E-01        |
| 132 | PC(P-38:5)      | 1.0351 | 0.9017 | 1.1927 | 6.28E-01        | 7.94E-01        |
| 133 | PC(P-16:0/22:6) | 1.0165 | 0.8830 | 1.1730 | 8.21E-01        | 8.93E-01        |
| 134 | PC(P-18:0/22:5) | 1.0042 | 0.8751 | 1.1567 | 9.53E-01        | 9.72E-01        |
| 135 | PC(P-18:0/22:6) | 1.0294 | 0.8958 | 1.1868 | 6.86E-01        | 8.44E-01        |
| 136 | LPC(14:0)       | 0.9325 | 0.8089 | 1.0752 | 3.36E-01        | 5.46E-01        |
| 137 | LPC(15:0)       | 1.0029 | 0.8689 | 1.1568 | 9.69E-01        | 9.78E-01        |
| 138 | LPC(16:0)       | 0.9879 | 0.8455 | 1.1529 | 8.78E-01        | 9.30E-01        |
| 139 | LPC(16:1)       | 1.0319 | 0.8886 | 1.1984 | 6.80E-01        | 8.39E-01        |
| 140 | LPC(17:0)       | 1.0231 | 0.8816 | 1.1857 | 7.62E-01        | 8.72E-01        |
| 141 | LPC(17:1)       | 1.1060 | 0.9572 | 1.2773 | 1.71E-01        | 3.85E-01        |
| 142 | LPC(18:0)       | 1.0188 | 0.8721 | 1.1884 | 8.14E-01        | 8.93E-01        |
| 143 | LPC(18:1)       | 1.0410 | 0.8957 | 1.2093 | 5.99E-01        | 7.75E-01        |
| 144 | LPC(18:2)       | 0.9870 | 0.8527 | 1.1428 | 8.61E-01        | 9.18E-01        |
| 145 | LPC(18:3)       | 1.0945 | 0.9463 | 1.2678 | 2.26E-01        | 4.34E-01        |
| 146 | LPC(20:0)       | 0.9224 | 0.7908 | 1.0741 | 3.01E-01        | 5.13E-01        |
| 147 | LPC(20:1)       | 1.1316 | 0.9756 | 1.3110 | 1.01E-01        | 2.64E-01        |
| 148 | LPC(20:2)       | 1.0828 | 0.9336 | 1.2544 | 2.91E-01        | 5.06E-01        |
| 149 | LPC(20:3)       | 0.9833 | 0.8467 | 1.1415 | 8.25E-01        | 8.94E-01        |
| 150 | LPC(20:4)       | 0.8741 | 0.7528 | 1.0145 | 7.70E-02        | 2.18E-01        |
| 151 | LPC(20:5)       | 1.1371 | 0.9903 | 1.3071 | 6.95E-02        | 2.05E-01        |
| 152 | LPC(22:0)       | 0.8409 | 0.7275 | 0.9702 | <b>1.83E-02</b> | 9.52E-02        |
| 153 | LPC(22:1)       | 1.2107 | 1.0688 | 1.3679 | <b>2.37E-03</b> | <b>2.32E-02</b> |
| 154 | LPC(22:5)       | 0.9575 | 0.8290 | 1.1042 | 5.53E-01        | 7.27E-01        |
| 155 | LPC(22:6)       | 1.0077 | 0.8733 | 1.1618 | 9.16E-01        | 9.52E-01        |
| 156 | LPC(24:0)       | 0.7847 | 0.6699 | 0.9175 | <b>2.52E-03</b> | <b>2.39E-02</b> |
| 157 | LPC(26:0)       | 0.9003 | 0.7710 | 1.0517 | 1.85E-01        | 4.08E-01        |
| 158 | LPC(O-16:0)     | 1.1840 | 1.0062 | 1.3918 | <b>4.12E-02</b> | 1.53E-01        |
| 159 | LPC(O-18:0)     | 1.1642 | 0.9852 | 1.3744 | 7.33E-02        | 2.13E-01        |
| 160 | LPC(O-18:1)     | 1.1995 | 1.0113 | 1.4224 | <b>3.65E-02</b> | 1.45E-01        |
| 161 | LPC(O-20:0)     | 0.8906 | 0.7810 | 1.0128 | 8.06E-02        | 2.26E-01        |
| 162 | LPC(O-20:1)     | 1.1361 | 0.9741 | 1.3237 | 1.03E-01        | 2.67E-01        |
| 163 | LPC(O-22:0)     | 1.1555 | 1.0002 | 1.3327 | <b>4.84E-02</b> | 1.62E-01        |
| 164 | LPC(O-22:1)     | 1.2058 | 1.0293 | 1.4110 | <b>2.00E-02</b> | 1.02E-01        |
| 165 | LPC(O-24:0)     | 1.1384 | 0.9790 | 1.3244 | 9.26E-02        | 2.46E-01        |
| 166 | LPC(O-24:1)     | 1.2545 | 1.0873 | 1.4455 | <b>1.79E-03</b> | <b>1.99E-02</b> |
| 167 | LPC(O-24:2)     | 1.0379 | 0.8973 | 1.1990 | 6.15E-01        | 7.87E-01        |
| 168 | PE(16:0_16:0)   | 1.1804 | 1.0046 | 1.3880 | <b>4.42E-02</b> | 1.56E-01        |
| 169 | PE(16:0_16:1)   | 1.2462 | 1.0521 | 1.4771 | <b>1.10E-02</b> | 6.78E-02        |
| 170 | PE(16:0_18:1)   | 1.2097 | 1.0169 | 1.4418 | <b>3.26E-02</b> | 1.34E-01        |
| 171 | PE(16:0_18:2)   | 1.1956 | 1.0159 | 1.4101 | <b>3.26E-02</b> | 1.34E-01        |
| 172 | PE(34:3)        | 1.2729 | 1.0805 | 1.5030 | <b>4.14E-03</b> | <b>3.33E-02</b> |
| 173 | PE(35:1)        | 1.2369 | 1.0502 | 1.4605 | <b>1.15E-02</b> | 6.95E-02        |
| 174 | PE(35:2)        | 1.2297 | 1.0484 | 1.4459 | <b>1.17E-02</b> | 6.95E-02        |
| 175 | PE(36:0)        | 1.0254 | 0.8807 | 1.1951 | 7.47E-01        | 8.67E-01        |
| 176 | PE(18:0_18:1)   | 1.2440 | 1.0396 | 1.4925 | <b>1.79E-02</b> | 9.46E-02        |
| 177 | PE(36:2)        | 1.2526 | 1.0577 | 1.4879 | <b>9.67E-03</b> | 6.13E-02        |
| 178 | PE(36:3)        | 1.1814 | 1.0064 | 1.3899 | <b>4.29E-02</b> | 1.53E-01        |
| 179 | PE(16:0_20:4)   | 1.1091 | 0.9485 | 1.3007 | 1.99E-01        | 4.21E-01        |

|     |                 |        |        |        |                 |                 |
|-----|-----------------|--------|--------|--------|-----------------|-----------------|
| 180 | PE(36:5)        | 1.2178 | 1.0503 | 1.4150 | <b>9.54E-03</b> | 6.13E-02        |
| 181 | PE(18:0_20:3)   | 1.1101 | 0.9341 | 1.3234 | 2.40E-01        | 4.55E-01        |
| 182 | PE(18:0_20:4)   | 1.0908 | 0.9278 | 1.2870 | 2.98E-01        | 5.11E-01        |
| 183 | PE(38:5)        | 1.0639 | 0.9104 | 1.2468 | 4.40E-01        | 6.47E-01        |
| 184 | PE(16:0_22:6)   | 1.0887 | 0.9358 | 1.2703 | 2.75E-01        | 4.98E-01        |
| 185 | PE(40:4)        | 0.9647 | 0.8232 | 1.1324 | 6.58E-01        | 8.28E-01        |
| 186 | PE(40:5)        | 0.9713 | 0.8249 | 1.1471 | 7.29E-01        | 8.66E-01        |
| 187 | PE(18:0_22:6)   | 1.0896 | 0.9314 | 1.2793 | 2.89E-01        | 5.06E-01        |
| 188 | PE(40:7)        | 1.0284 | 0.8924 | 1.1885 | 7.01E-01        | 8.55E-01        |
| 189 | PE(O-18:0/22:5) | 1.0127 | 0.8803 | 1.1686 | 8.61E-01        | 9.18E-01        |
| 190 | PE(O-36:3)      | 1.0248 | 0.8874 | 1.1846 | 7.39E-01        | 8.66E-01        |
| 191 | PE(O-38:4)      | 0.9871 | 0.8567 | 1.1398 | 8.59E-01        | 9.18E-01        |
| 192 | PE(O-16:0/20:4) | 1.0529 | 0.9141 | 1.2141 | 4.76E-01        | 6.70E-01        |
| 193 | PE(O-38:5)      | 1.0455 | 0.9099 | 1.2037 | 5.33E-01        | 7.15E-01        |
| 194 | PE(O-18:1/22:6) | 0.9798 | 0.8570 | 1.1236 | 7.68E-01        | 8.72E-01        |
| 195 | PE(O-34:1)      | 1.1593 | 0.9993 | 1.3470 | 5.22E-02        | 1.67E-01        |
| 196 | PE(O-16:0/18:2) | 1.1842 | 1.0248 | 1.3697 | <b>2.23E-02</b> | 1.11E-01        |
| 197 | PE(O-36:2)      | 1.0696 | 0.9255 | 1.2380 | 3.64E-01        | 5.73E-01        |
| 198 | PE(O-36:5)      | 1.1558 | 1.0015 | 1.3362 | <b>4.90E-02</b> | 1.63E-01        |
| 199 | PE(O-36:6)      | 1.0945 | 0.9519 | 1.2607 | 2.08E-01        | 4.22E-01        |
| 200 | PE(O-18:0/22:6) | 1.0156 | 0.8904 | 1.1639 | 8.21E-01        | 8.93E-01        |
| 201 | PE(P-34:1)      | 1.0469 | 0.9040 | 1.2144 | 5.43E-01        | 7.26E-01        |
| 202 | PE(P-34:2)      | 1.0176 | 0.8829 | 1.1744 | 8.10E-01        | 8.93E-01        |
| 203 | PE(P-36:4)      | 0.9386 | 0.8160 | 1.0810 | 3.77E-01        | 5.80E-01        |
| 204 | PE(P-38:5)      | 1.0085 | 0.8769 | 1.1630 | 9.06E-01        | 9.45E-01        |
| 205 | PE(P-38:6)      | 0.9872 | 0.8587 | 1.1379 | 8.58E-01        | 9.18E-01        |
| 206 | PE(P-36:1)      | 1.0761 | 0.9324 | 1.2444 | 3.19E-01        | 5.29E-01        |
| 207 | PE(P-36:2)      | 1.0000 | 0.8670 | 1.1555 | 1.00E+00        | 1.00E+00        |
| 208 | PE(P-38:4)      | 0.9102 | 0.7923 | 1.0483 | 1.88E-01        | 4.09E-01        |
| 209 | PE(P-40:5)      | 0.9592 | 0.8371 | 1.1030 | 5.53E-01        | 7.27E-01        |
| 210 | PE(P-40:6)      | 0.9630 | 0.8405 | 1.1067 | 5.91E-01        | 7.71E-01        |
| 211 | PE(P-40:4)      | 0.9273 | 0.8074 | 1.0668 | 2.88E-01        | 5.06E-01        |
| 212 | PE(16:0/0:0)    | 1.1818 | 1.0057 | 1.3884 | <b>4.22E-02</b> | 1.53E-01        |
| 213 | PE(18:0/0:0)    | 1.1675 | 0.9985 | 1.3643 | 5.17E-02        | 1.67E-01        |
| 214 | PE(18:1/0:0)    | 1.1011 | 0.9458 | 1.2822 | 2.15E-01        | 4.29E-01        |
| 215 | PE(18:2/0:0)    | 1.0225 | 0.9047 | 1.1594 | 7.25E-01        | 8.66E-01        |
| 216 | PE(20:4/0:0)    | 0.9791 | 0.8607 | 1.1173 | 7.51E-01        | 8.67E-01        |
| 217 | PE(22:6/0:0)    | 1.0820 | 0.9423 | 1.2451 | 2.67E-01        | 4.89E-01        |
| 218 | PI(16:0/16:0)   | 1.1962 | 1.0204 | 1.4027 | <b>2.73E-02</b> | 1.22E-01        |
| 219 | PI(16:0_16:1)   | 1.1121 | 0.9423 | 1.3123 | 2.09E-01        | 4.22E-01        |
| 220 | PI(34:0)        | 1.0931 | 0.9601 | 1.2488 | 1.84E-01        | 4.08E-01        |
| 221 | PI(34:1)        | 1.1510 | 0.9811 | 1.3506 | 8.45E-02        | 2.31E-01        |
| 222 | PI(18:0_18:1)   | 1.1644 | 0.9976 | 1.3606 | 5.45E-02        | 1.69E-01        |
| 223 | PI(36:2)        | 1.0244 | 0.8754 | 1.2004 | 7.65E-01        | 8.72E-01        |
| 224 | PI(36:3)        | 0.9900 | 0.8468 | 1.1586 | 9.00E-01        | 9.44E-01        |
| 225 | PI(16:0_20:4)   | 0.9577 | 0.8157 | 1.1261 | 5.99E-01        | 7.75E-01        |
| 226 | PI(18:0_20:2)   | 1.1020 | 0.9439 | 1.2887 | 2.21E-01        | 4.30E-01        |
| 227 | PI(18:0_20:3)   | 0.9957 | 0.8496 | 1.1702 | 9.58E-01        | 9.73E-01        |
| 228 | PI(18:0_20:4)   | 1.0239 | 0.8864 | 1.1869 | 7.51E-01        | 8.67E-01        |
| 229 | PI(38:5)        | 0.9258 | 0.8021 | 1.0701 | 2.94E-01        | 5.09E-01        |
| 230 | PI(38:6)        | 0.9906 | 0.8617 | 1.1401 | 8.95E-01        | 9.44E-01        |
| 231 | PI(40:4)        | 0.8745 | 0.7545 | 1.0154 | 7.68E-02        | 2.18E-01        |
| 232 | PI(18:0_22:5)   | 0.9461 | 0.8216 | 1.0912 | 4.44E-01        | 6.47E-01        |
| 233 | PI(18:0_22:6)   | 1.0753 | 0.9295 | 1.2456 | 3.31E-01        | 5.41E-01        |
| 234 | LPI(18:0)       | 1.1494 | 0.9469 | 1.3944 | 1.58E-01        | 3.61E-01        |
| 235 | LPI(18:1)       | 1.3924 | 1.1988 | 1.6178 | <b>1.49E-05</b> | <b>5.98E-04</b> |
| 236 | LPI(18:2)       | 1.4249 | 1.2236 | 1.6603 | <b>5.37E-06</b> | <b>5.26E-04</b> |
| 237 | LPI(20:4)       | 1.3010 | 1.1175 | 1.5147 | <b>6.92E-04</b> | <b>1.01E-02</b> |
| 238 | PG(34:1)        | 1.1786 | 0.9984 | 1.3936 | 5.32E-02        | 1.68E-01        |
| 239 | PG(36:1)        | 1.4605 | 1.2112 | 1.7666 | <b>8.35E-05</b> | <b>2.07E-03</b> |
| 240 | PG(36:2)        | 1.1563 | 0.9692 | 1.383  | 1.09E-01        | 2.73E-01        |

|     |               |        |        |        |                 |                 |
|-----|---------------|--------|--------|--------|-----------------|-----------------|
| 241 | COH           | 1.0674 | 0.9059 | 1.2649 | 4.44E-01        | 6.47E-01        |
| 242 | CE(14:0)      | 1.2081 | 1.0219 | 1.4321 | <b>2.81E-02</b> | 1.24E-01        |
| 243 | CE(15:0)      | 1.3318 | 1.1446 | 1.5528 | <b>2.31E-04</b> | <b>4.95E-03</b> |
| 244 | CE(16:0)      | 1.2743 | 1.0749 | 1.5164 | <b>5.77E-03</b> | <b>4.42E-02</b> |
| 245 | CE(16:1)      | 1.1832 | 1.0040 | 1.3969 | <b>4.58E-02</b> | 1.59E-01        |
| 246 | CE(16:2)      | 0.9963 | 0.8479 | 1.1754 | 9.65E-01        | 9.77E-01        |
| 247 | CE(17:0)      | 1.1904 | 1.0225 | 1.3884 | <b>2.55E-02</b> | 1.19E-01        |
| 248 | CE(17:1)      | 1.2720 | 1.0881 | 1.4919 | <b>2.81E-03</b> | <b>2.51E-02</b> |
| 249 | CE(18:0)      | 1.0759 | 0.9121 | 1.2740 | 3.91E-01        | 5.97E-01        |
| 250 | CE(18:1)      | 1.2720 | 1.0881 | 1.4919 | <b>2.81E-03</b> | <b>2.51E-02</b> |
| 251 | CE(18:2)      | 1.0558 | 0.8957 | 1.2538 | 5.27E-01        | 7.13E-01        |
| 252 | CE(18:3)      | 1.0828 | 0.9195 | 1.2826 | 3.49E-01        | 5.62E-01        |
| 253 | CE(20:1)      | 1.3243 | 1.1356 | 1.5443 | <b>3.41E-04</b> | <b>6.61E-03</b> |
| 254 | CE(20:2)      | 1.2169 | 1.0362 | 1.4336 | <b>1.78E-02</b> | 9.46E-02        |
| 255 | CE(20:3)      | 1.0265 | 0.8831 | 1.1983 | 7.37E-01        | 8.66E-01        |
| 256 | CE(20:4)      | 0.9209 | 0.8006 | 1.0661 | 2.59E-01        | 4.82E-01        |
| 257 | CE(20:5)      | 1.0733 | 0.9364 | 1.2349 | 3.17E-01        | 5.28E-01        |
| 258 | CE(22:0)      | 1.0584 | 0.8984 | 1.2493 | 5.00E-01        | 6.88E-01        |
| 259 | CE(22:1)      | 1.2909 | 1.1221 | 1.4846 | <b>3.49E-04</b> | <b>6.61E-03</b> |
| 260 | CE(22:4)      | 0.9728 | 0.8434 | 1.1269 | 7.09E-01        | 8.61E-01        |
| 261 | CE(22:5)      | 0.9118 | 0.7918 | 1.0553 | 2.07E-01        | 4.22E-01        |
| 262 | CE(22:6)      | 0.9395 | 0.8221 | 1.0785 | 3.67E-01        | 5.73E-01        |
| 263 | CE(24:0)      | 1.0263 | 0.8618 | 1.2233 | 7.72E-01        | 8.72E-01        |
| 264 | CE(24:1)      | 1.2637 | 1.0727 | 1.4918 | <b>5.40E-03</b> | <b>4.24E-02</b> |
| 265 | CE(24:4)      | 1.0736 | 0.9284 | 1.2443 | 3.42E-01        | 5.53E-01        |
| 266 | CE(24:5)      | 1.0479 | 0.9087 | 1.2107 | 5.23E-01        | 7.10E-01        |
| 267 | CE(24:6)      | 0.9805 | 0.8509 | 1.1318 | 7.86E-01        | 8.73E-01        |
| 268 | DG(14:0/16:0) | 1.0524 | 0.9153 | 1.2059 | 4.68E-01        | 6.63E-01        |
| 269 | DG(16:0/16:0) | 1.0547 | 0.9297 | 1.1931 | 4.02E-01        | 6.08E-01        |
| 270 | DG(14:0/18:1) | 0.9918 | 0.8187 | 1.2033 | 9.33E-01        | 9.60E-01        |
| 271 | DG(14:0/18:2) | 0.8354 | 0.7011 | 0.9963 | <b>4.47E-02</b> | 1.56E-01        |
| 272 | DG(16:0/18:0) | 1.0377 | 0.9376 | 1.1445 | 4.66E-01        | 6.63E-01        |
| 273 | DG(16:0/18:1) | 1.2265 | 0.9956 | 1.5157 | 5.68E-02        | 1.74E-01        |
| 274 | DG(16:1/18:0) | 1.2445 | 1.0240 | 1.5146 | <b>2.85E-02</b> | 1.24E-01        |
| 275 | DG(16:1/18:1) | 1.1016 | 0.9077 | 1.3407 | 3.31E-01        | 5.41E-01        |
| 276 | DG(16:0/18:2) | 0.9361 | 0.7759 | 1.1305 | 4.91E-01        | 6.79E-01        |
| 277 | DG(18:0/18:0) | 1.0578 | 0.9318 | 1.2006 | 3.84E-01        | 5.89E-01        |
| 278 | DG(18:0/18:1) | 1.3787 | 1.1236 | 1.6944 | <b>2.18E-03</b> | <b>2.27E-02</b> |
| 279 | DG(18:1/18:1) | 1.1612 | 0.9513 | 1.4224 | 1.45E-01        | 3.39E-01        |
| 280 | DG(18:0/18:2) | 1.0850 | 0.8925 | 1.3209 | 4.15E-01        | 6.20E-01        |
| 281 | DG(18:1/18:2) | 0.8639 | 0.7230 | 1.0343 | 1.09E-01        | 2.73E-01        |
| 282 | DG(16:0/20:3) | 0.9980 | 0.8294 | 1.2033 | 9.83E-01        | 9.86E-01        |
| 283 | DG(18:2/18:2) | 0.8014 | 0.6817 | 0.9411 | <b>7.11E-03</b> | <b>4.91E-02</b> |
| 284 | DG(18:1/18:3) | 0.8991 | 0.7595 | 1.0660 | 2.19E-01        | 4.30E-01        |
| 285 | DG(16:0/20:4) | 0.8969 | 0.7546 | 1.0680 | 2.20E-01        | 4.30E-01        |
| 286 | DG(18:1/20:0) | 1.0842 | 0.9503 | 1.2351 | 2.27E-01        | 4.34E-01        |
| 287 | DG(18:1/20:3) | 0.9188 | 0.7802 | 1.0841 | 3.13E-01        | 5.24E-01        |
| 288 | DG(18:0/20:4) | 0.9719 | 0.8288 | 1.1410 | 7.27E-01        | 8.66E-01        |
| 289 | DG(18:1/20:4) | 0.8291 | 0.7054 | 0.9760 | <b>2.36E-02</b> | 1.14E-01        |
| 290 | DG(16:0/22:5) | 0.9347 | 0.8098 | 1.0843 | 3.65E-01        | 5.73E-01        |
| 291 | DG(16:0/22:6) | 0.9911 | 0.8565 | 1.1497 | 9.05E-01        | 9.45E-01        |
| 292 | TG(48:0)      | 1.1732 | 0.9842 | 1.3984 | 7.46E-02        | 2.14E-01        |
| 293 | TG(48:1)      | 1.0304 | 0.8638 | 1.2317 | 7.41E-01        | 8.66E-01        |
| 294 | TG(48:2)      | 0.9297 | 0.7808 | 1.1095 | 4.16E-01        | 6.20E-01        |
| 295 | TG(48:3)      | 0.8688 | 0.7354 | 1.0278 | 9.93E-02        | 2.62E-01        |
| 296 | TG(49:1)      | 1.0916 | 0.9224 | 1.2945 | 3.10E-01        | 5.23E-01        |
| 297 | TG(50:0)      | 1.2508 | 1.0424 | 1.501  | <b>1.61E-02</b> | 9.03E-02        |
| 298 | TG(50:1)      | 1.1193 | 0.9411 | 1.3348 | 2.06E-01        | 4.22E-01        |
| 299 | TG(50:2)      | 1.0388 | 0.8979 | 1.2206 | 6.23E-01        | 7.93E-01        |
| 300 | TG(50:3)      | 0.8501 | 0.7191 | 1.0099 | 6.07E-02        | 1.83E-01        |
| 301 | TG(50:4)      | 0.7943 | 0.6799 | 0.9314 | <b>4.11E-03</b> | <b>3.33E-02</b> |



|     |          |        |        |        |                 |          |
|-----|----------|--------|--------|--------|-----------------|----------|
| 302 | TG(51:1) | 1.1396 | 0.9576 | 1.3605 | 1.45E-01        | 3.39E-01 |
| 303 | TG(51:2) | 1.0663 | 0.9068 | 1.2585 | 4.43E-01        | 6.47E-01 |
| 304 | TG(52:1) | 1.1286 | 0.9377 | 1.3635 | 2.05E-01        | 4.22E-01 |
| 305 | TG(52:2) | 1.0601 | 0.9058 | 1.2468 | 4.74E-01        | 6.69E-01 |
| 306 | TG(52:3) | 0.8848 | 0.7649 | 1.0275 | 1.04E-01        | 2.67E-01 |
| 307 | TG(52:4) | 0.8386 | 0.7228 | 0.9762 | <b>2.17E-02</b> | 1.09E-01 |
| 308 | TG(53:2) | 1.1075 | 0.9421 | 1.3069 | 2.21E-01        | 4.30E-01 |
| 309 | TG(54:0) | 1.1045 | 0.9649 | 1.2664 | 1.52E-01        | 3.49E-01 |
| 310 | TG(54:1) | 1.2153 | 1.0109 | 1.4624 | <b>3.84E-02</b> | 1.49E-01 |
| 311 | TG(54:2) | 1.1921 | 1.0002 | 1.4261 | 5.22E-02        | 1.67E-01 |
| 312 | TG(54:3) | 1.0699 | 0.9247 | 1.2406 | 3.67E-01        | 5.73E-01 |
| 313 | TG(54:4) | 0.9104 | 0.7853 | 1.0574 | 2.16E-01        | 4.29E-01 |
| 314 | TG(54:5) | 0.8927 | 0.7663 | 1.0416 | 1.47E-01        | 3.41E-01 |
| 315 | TG(54:6) | 0.8453 | 0.7257 | 0.9858 | <b>3.13E-02</b> | 1.33E-01 |
| 316 | TG(56:6) | 0.8537 | 0.739  | 0.989  | <b>3.33E-02</b> | 1.34E-01 |

---

**Supplementary Table 5.** Odds ratios and p-values of plasma lipid species in ADVANCE subset 2 against the future incidence of AF

| lipid | Predictors                    | Odds Ratio | lower CI | upper CI | P-value         | Adjusted P-value (BH) |
|-------|-------------------------------|------------|----------|----------|-----------------|-----------------------|
| 1     | dhCer(d18:0/16:0)             | 1.1468     | 0.9294   | 1.4171   | 2.03E-01        | 8.91E-01              |
| 2     | dhCer(d18:0/18:0)             | 1.0589     | 0.8521   | 1.3070   | 5.99E-01        | 8.95E-01              |
| 3     | dhCer(d18:0/20:0)             | 1.1196     | 0.9023   | 1.3892   | 3.05E-01        | 8.95E-01              |
| 4     | dhCer(d18:0/22:0)             | 1.0684     | 0.8512   | 1.3434   | 5.70E-01        | 8.95E-01              |
| 5     | dhCer(d18:0/24:0)             | 1.0852     | 0.8684   | 1.3565   | 4.72E-01        | 8.95E-01              |
| 6     | dhCer(d18:0/24:1)             | 1.0536     | 0.8530   | 1.3065   | 6.31E-01        | 8.95E-01              |
| 7     | Cer(d18:1/16:0)               | 1.1406     | 0.9121   | 1.4321   | 2.53E-01        | 8.95E-01              |
| 8     | Cer(d18:1/18:0)               | 1.1353     | 0.9097   | 1.4217   | 2.65E-01        | 8.95E-01              |
| 9     | Cer(d18:1/20:0)               | 1.1092     | 0.8838   | 1.4007   | 3.78E-01        | 8.95E-01              |
| 10    | Cer(d18:1/22:0)               | 1.1319     | 0.9058   | 1.4258   | 2.85E-01        | 8.95E-01              |
| 11    | Cer(d18:1/24:0)               | 1.0629     | 0.8553   | 1.3312   | 5.89E-01        | 8.95E-01              |
| 12    | Cer(d18:1/24:1)               | 1.2586     | 1.0035   | 1.5898   | 5.02E-02        | 6.34E-01              |
| 13    | HexCer(d18:1/16:0)            | 0.9691     | 0.7763   | 1.2165   | 7.84E-01        | 9.54E-01              |
| 14    | HexCer(d18:1/18:0)            | 1.2674     | 1.0020   | 1.6117   | 5.06E-02        | 6.34E-01              |
| 15    | HexCer(d18:1/20:0)            | 1.2934     | 1.0284   | 1.6372   | <b>3.01E-02</b> | 6.34E-01              |
| 16    | HexCer(d18:1/22:0)            | 1.1188     | 0.8929   | 1.4087   | 3.34E-01        | 8.95E-01              |
| 17    | HexCer(d18:1/24:0)            | 1.1015     | 0.8702   | 1.4007   | 4.26E-01        | 8.95E-01              |
| 18    | HexCer(d18:1/24:1)            | 1.1379     | 0.9025   | 1.4401   | 2.78E-01        | 8.95E-01              |
| 19    | Hex2Cer(d18:1/16:0)           | 0.9924     | 0.7944   | 1.2443   | 9.47E-01        | 9.87E-01              |
| 20    | Hex2Cer(d18:1/18:0)           | 1.1390     | 0.9252   | 1.4120   | 2.27E-01        | 8.95E-01              |
| 21    | Hex2Cer(d18:1/20:0)           | 1.0805     | 0.8840   | 1.3269   | 4.55E-01        | 8.95E-01              |
| 22    | Hex2Cer(d18:1/22:0)           | 1.3722     | 1.1040   | 1.7086   | <b>4.52E-03</b> | 1.62E-01              |
| 23    | Hex2Cer(d18:1/24:0)           | 1.3149     | 1.0469   | 1.6544   | <b>1.90E-02</b> | 4.71E-01              |
| 24    | Hex2Cer(d18:1/24:1)           | 1.0922     | 0.8710   | 1.3738   | 4.48E-01        | 8.95E-01              |
| 25    | Hex3Cer(d18:1/16:0)           | 0.9982     | 0.9055   | 1.0932   | 9.70E-01        | 9.97E-01              |
| 26    | Hex3Cer(d18:1/18:0)           | 1.0789     | 0.8662   | 1.3482   | 5.01E-01        | 8.95E-01              |
| 27    | Hex3Cer(d18:1/20:0)           | 1.2094     | 0.9776   | 1.5079   | 8.54E-02        | 6.74E-01              |
| 28    | Hex3Cer(d18:1/22:0)           | 1.2044     | 0.9628   | 1.5141   | 1.07E-01        | 7.85E-01              |
| 29    | Hex3Cer(d18:1/24:0)           | 1.1821     | 0.9461   | 1.4831   | 1.44E-01        | 8.78E-01              |
| 30    | Hex3Cer(d18:1/24:1)           | 1.2400     | 0.9745   | 1.5846   | 8.28E-02        | 6.74E-01              |
| 31    | GM3(d18:1/16:0)               | 1.2562     | 0.9868   | 1.6115   | 6.84E-02        | 6.34E-01              |
| 32    | GM3(d18:1/18:0)               | 0.6836     | 0.5603   | 0.8339   | <b>1.76E-04</b> | <b>1.41E-02</b>       |
| 33    | GM3(d18:1/20:0)               | 0.7388     | 0.6063   | 0.9003   | <b>2.67E-03</b> | 1.23E-01              |
| 34    | GM3(d18:1/22:0)               | 0.7754     | 0.6397   | 0.9411   | <b>9.76E-03</b> | 3.14E-01              |
| 35    | GM3(d18:1/24:0)               | 0.8130     | 0.6689   | 0.9902   | <b>3.84E-02</b> | 6.34E-01              |
| 36    | GM3(d18:1/24:1)               | 0.6378     | 0.5199   | 0.7813   | <b>1.49E-05</b> | <b>4.80E-03</b>       |
| 37    | SM(d17:1/14:0)                | 0.8420     | 0.6718   | 1.0590   | 1.38E-01        | 8.74E-01              |
| 38    | SM(d18:0/14:0)                | 0.8844     | 0.7068   | 1.1101   | 2.86E-01        | 8.95E-01              |
| 39    | SM(d18:1/14:0)/SM(d16:1/16:0) | 0.9387     | 0.7519   | 1.1820   | 5.84E-01        | 8.95E-01              |
| 40    | SM(d18:2/14:0)                | 0.8991     | 0.7026   | 1.1567   | 4.03E-01        | 8.95E-01              |
| 41    | SM(d17:1/16:0)                | 0.9511     | 0.7705   | 1.1835   | 6.47E-01        | 9.01E-01              |
| 42    | SM(d18:0/16:0)                | 1.1285     | 0.8996   | 1.4200   | 2.99E-01        | 8.95E-01              |
| 43    | SM(d18:1/16:0)                | 1.0691     | 0.8587   | 1.3367   | 5.54E-01        | 8.95E-01              |
| 44    | SM(d18:2/16:0)                | 1.1279     | 0.8818   | 1.4618   | 3.51E-01        | 8.95E-01              |
| 45    | SM(34:3)                      | 0.9103     | 0.7340   | 1.1379   | 4.01E-01        | 8.95E-01              |
| 46    | SM(35:1)                      | 0.9420     | 0.7681   | 1.1630   | 5.72E-01        | 8.95E-01              |
| 47    | SM(35:2)                      | 0.9121     | 0.7456   | 1.1290   | 3.84E-01        | 8.95E-01              |
| 48    | SM(d18:1/18:0)/SM(d16:1/20:0) | 1.0933     | 0.8804   | 1.3619   | 4.23E-01        | 8.95E-01              |
| 49    | SM(d18:2/18:0)                | 1.0592     | 0.8452   | 1.3413   | 6.26E-01        | 8.95E-01              |
| 50    | SM(d18:2/18:1)                | 0.9974     | 0.8133   | 1.2284   | 9.80E-01        | 9.97E-01              |
| 51    | SM(d18:1/20:0)/SM(d16:1/22:0) | 1.0784     | 0.8640   | 1.3581   | 5.13E-01        | 8.95E-01              |
| 52    | SM(d18:2/20:0)                | 1.1682     | 0.9287   | 1.4847   | 1.94E-01        | 8.91E-01              |
| 53    | SM(d16:1/23:0)/SM(d17:1/22:0) | 0.9234     | 0.7502   | 1.1436   | 4.59E-01        | 8.95E-01              |
| 54    | SM(41:1)                      | 0.9264     | 0.7477   | 1.1528   | 4.89E-01        | 8.95E-01              |
| 55    | SM(41:2)                      | 0.9028     | 0.7250   | 1.1320   | 3.69E-01        | 8.95E-01              |
| 56    | SM(d18:1/24:0)                | 0.9719     | 0.7864   | 1.2032   | 7.93E-01        | 9.54E-01              |
| 57    | PC(29:0)                      | 1.0017     | 0.8116   | 1.2373   | 9.87E-01        | 9.97E-01              |

|     |                                |        |        |        |                 |          |
|-----|--------------------------------|--------|--------|--------|-----------------|----------|
| 58  | PC(31:0)                       | 0.9556 | 0.7676 | 1.1927 | 6.86E-01        | 9.24E-01 |
| 59  | PC (31:1)                      | 0.9345 | 0.7545 | 1.1671 | 5.43E-01        | 8.95E-01 |
| 60  | PC(33:0)                       | 0.9923 | 0.7967 | 1.2409 | 9.45E-01        | 9.87E-01 |
| 61  | PC(33:1)                       | 1.0059 | 0.7999 | 1.2693 | 9.60E-01        | 9.97E-01 |
| 62  | PC(33:2)                       | 0.9896 | 0.7904 | 1.2455 | 9.28E-01        | 9.87E-01 |
| 63  | PC (33:3)                      | 0.9431 | 0.7555 | 1.1816 | 6.08E-01        | 8.95E-01 |
| 64  | PC (35:0)                      | 0.9461 | 0.7631 | 1.1781 | 6.17E-01        | 8.95E-01 |
| 65  | PC(35:1)                       | 0.9406 | 0.7603 | 1.1709 | 5.78E-01        | 8.95E-01 |
| 66  | PC(35:2)                       | 1.0726 | 0.8619 | 1.3449 | 5.37E-01        | 8.95E-01 |
| 67  | PC(35:3)                       | 0.9892 | 0.7933 | 1.2430 | 9.25E-01        | 9.87E-01 |
| 68  | PC(15:0_20:4)                  | 0.9671 | 0.7849 | 1.1976 | 7.56E-01        | 9.46E-01 |
| 69  | PC(15-MHDA_20:4)\PC(17:0_20:4) | 1.0383 | 0.8488 | 1.2819 | 7.21E-01        | 9.33E-01 |
| 70  | PC(37:5)                       | 0.9424 | 0.8136 | 1.1107 | 4.53E-01        | 8.95E-01 |
| 71  | PC(15:0_22:6)                  | 0.9442 | 0.7664 | 1.1694 | 5.94E-01        | 8.95E-01 |
| 72  | PC(39:5)                       | 1.0375 | 0.8461 | 1.2849 | 7.30E-01        | 9.40E-01 |
| 73  | PC(39:6)                       | 1.0016 | 0.8156 | 1.2372 | 9.88E-01        | 9.97E-01 |
| 74  | PC(39:7)                       | 0.9591 | 0.7850 | 1.1746 | 6.85E-01        | 9.24E-01 |
| 75  | PC(28:0)                       | 0.8729 | 0.7083 | 1.0747 | 2.01E-01        | 8.91E-01 |
| 76  | PC(14:0_16:0)                  | 0.9805 | 0.7802 | 1.2339 | 8.67E-01        | 9.71E-01 |
| 77  | PC(16:0_16:0)                  | 1.2741 | 1.0069 | 1.6200 | <b>4.59E-02</b> | 6.34E-01 |
| 78  | PC(32:1)                       | 1.1370 | 0.8952 | 1.4476 | 2.95E-01        | 8.95E-01 |
| 79  | PC(32:2)                       | 1.0157 | 0.7920 | 1.3153 | 9.04E-01        | 9.82E-01 |
| 80  | PC(32:3)                       | 0.9477 | 0.7827 | 1.1664 | 5.96E-01        | 8.95E-01 |
| 81  | PC(16:0_18:0)                  | 1.1147 | 0.8803 | 1.4235 | 3.76E-01        | 8.95E-01 |
| 82  | PC(16:0_18:1)                  | 1.2688 | 0.9925 | 1.6342 | 6.12E-02        | 6.34E-01 |
| 83  | PC(16:0_18:2)                  | 1.2748 | 1.0131 | 1.6207 | <b>4.28E-02</b> | 6.34E-01 |
| 84  | PC(16:1_18:2)\PC(16:0_18:3)    | 1.1320 | 0.8967 | 1.4392 | 3.04E-01        | 8.95E-01 |
| 85  | PC(14:0_20:4)                  | 0.9540 | 0.7618 | 1.2023 | 6.86E-01        | 9.24E-01 |
| 86  | PC(34:5)                       | 0.8996 | 0.7344 | 1.1060 | 3.11E-01        | 8.95E-01 |
| 87  | PC(36:0)                       | 0.9783 | 0.7908 | 1.2198 | 8.43E-01        | 9.71E-01 |
| 88  | PC(18:0_18:1)                  | 1.0230 | 0.8073 | 1.3040 | 8.52E-01        | 9.71E-01 |
| 89  | PC(36:2)                       | 1.1790 | 0.9295 | 1.5167 | 1.88E-01        | 8.91E-01 |
| 90  | PC(18:1_18:2)\PC(16:0_20:3)    | 1.1131 | 0.8763 | 1.4283 | 3.90E-01        | 8.95E-01 |
| 91  | PC(18:2_18:2)\PC(16:0_20_4)    | 0.9752 | 0.7385 | 1.2943 | 8.60E-01        | 9.71E-01 |
| 92  | PC(36:5)                       | 1.0745 | 0.8012 | 1.4398 | 6.30E-01        | 8.95E-01 |
| 93  | PC(18:0_20:3)                  | 0.9012 | 0.7194 | 1.1357 | 3.72E-01        | 8.95E-01 |
| 94  | PC(38:4)                       | 1.0725 | 0.8661 | 1.3388 | 5.29E-01        | 8.95E-01 |
| 95  | PC(38:5)                       | 1.0356 | 0.8402 | 1.2870 | 7.48E-01        | 9.42E-01 |
| 96  | PC(38:6)                       | 1.0272 | 0.8409 | 1.2622 | 7.95E-01        | 9.54E-01 |
| 97  | PC(38:7)                       | 0.9823 | 0.8052 | 1.2050 | 8.62E-01        | 9.71E-01 |
| 98  | PC(18:0_22:4)\PC(20:0_20:4)    | 1.0798 | 0.8570 | 1.3676 | 5.20E-01        | 8.95E-01 |
| 99  | PC(18:0_22:5)                  | 1.0431 | 0.8412 | 1.3031 | 7.06E-01        | 9.29E-01 |
| 100 | PC(18:0_22:6)                  | 0.9966 | 0.8172 | 1.2221 | 9.74E-01        | 9.97E-01 |
| 101 | PC(40:7)                       | 1.0114 | 0.8245 | 1.2499 | 9.15E-01        | 9.82E-01 |
| 102 | PC(40:8)                       | 0.9793 | 0.7857 | 1.2294 | 8.55E-01        | 9.71E-01 |
| 103 | PC(O-16:0/16:0)                | 1.1127 | 0.9051 | 1.3725 | 3.15E-01        | 8.95E-01 |
| 104 | PC(O-32:1)                     | 1.1519 | 0.9364 | 1.4202 | 1.83E-01        | 8.91E-01 |
| 105 | PC(O-32:2)                     | 1.0614 | 0.8807 | 1.2753 | 5.28E-01        | 8.95E-01 |
| 106 | PC(O-34:1)                     | 1.2603 | 1.0076 | 1.5854 | <b>4.55E-02</b> | 6.34E-01 |
| 107 | PC(O-34:2)                     | 1.1105 | 0.8966 | 1.3778 | 3.39E-01        | 8.95E-01 |
| 108 | PC(O-34:3)                     | 1.0084 | 0.8180 | 1.2451 | 9.38E-01        | 9.87E-01 |
| 109 | PC(O-34:4)                     | 1.0515 | 0.8521 | 1.2981 | 6.40E-01        | 9.01E-01 |
| 110 | PC(O-35:4)                     | 1.0627 | 0.8508 | 1.3351 | 5.97E-01        | 8.95E-01 |
| 111 | PC(O-36:0)                     | 1.1849 | 0.9498 | 1.4756 | 1.31E-01        | 8.74E-01 |
| 112 | PC(O-36:1)                     | 1.1436 | 0.9189 | 1.4311 | 2.35E-01        | 8.95E-01 |
| 113 | PC(O-36:2)                     | 1.1420 | 0.9167 | 1.4300 | 2.42E-01        | 8.95E-01 |
| 114 | PC(O-36:3)                     | 1.0696 | 0.8624 | 1.3352 | 5.46E-01        | 8.95E-01 |
| 115 | PC(O-36:4)                     | 1.0965 | 0.8888 | 1.3578 | 3.94E-01        | 8.95E-01 |
| 116 | PC(O-36:5)                     | 1.0125 | 0.8227 | 1.2475 | 9.07E-01        | 9.82E-01 |
| 117 | PC(O-18:0/20:4)                | 1.1126 | 0.9004 | 1.3843 | 3.31E-01        | 8.95E-01 |
| 118 | PC(O-38:5)                     | 1.0859 | 0.8846 | 1.3419 | 4.39E-01        | 8.95E-01 |

|     |                 |        |        |        |                 |          |
|-----|-----------------|--------|--------|--------|-----------------|----------|
| 119 | PC(O-40:5)      | 1.0790 | 0.8791 | 1.3345 | 4.76E-01        | 8.95E-01 |
| 120 | PC(O-18:0/22:6) | 1.0864 | 0.8821 | 1.3497 | 4.45E-01        | 8.95E-01 |
| 121 | PC(O-40:7)      | 1.0295 | 0.8414 | 1.2685 | 7.81E-01        | 9.54E-01 |
| 122 | PC(P-16:0/14:0) | 1.0773 | 0.8543 | 1.3601 | 5.30E-01        | 8.95E-01 |
| 123 | PC(P-16:0/16:0) | 1.2483 | 1.0009 | 1.5639 | 5.14E-02        | 6.34E-01 |
| 124 | PC(P-16:0/16:1) | 1.1364 | 0.9142 | 1.4166 | 2.52E-01        | 8.95E-01 |
| 125 | PC(P-16:0/18:1) | 1.4755 | 1.1404 | 1.9166 | <b>3.31E-03</b> | 1.33E-01 |
| 126 | PC(P-16:0/18:2) | 1.2370 | 0.9725 | 1.5800 | 8.58E-02        | 6.74E-01 |
| 127 | PC(P-16:0/18:3) | 1.2439 | 0.9877 | 1.5705 | 6.50E-02        | 6.34E-01 |
| 128 | PC(P-36:2)      | 1.1669 | 0.9300 | 1.4701 | 1.87E-01        | 8.91E-01 |
| 129 | PC(P-16:0/20:4) | 1.1597 | 0.9342 | 1.4473 | 1.85E-01        | 8.91E-01 |
| 130 | PC(P-16:0/20:5) | 1.0146 | 0.8275 | 1.2474 | 8.89E-01        | 9.81E-01 |
| 131 | PC(P-18:0/20:4) | 1.0650 | 0.8672 | 1.3225 | 5.60E-01        | 8.95E-01 |
| 132 | PC(P-38:5)      | 1.0537 | 0.8622 | 1.2973 | 6.16E-01        | 8.95E-01 |
| 133 | PC(P-16:0/22:6) | 1.0709 | 0.8718 | 1.3219 | 5.19E-01        | 8.95E-01 |
| 134 | PC(P-18:0/22:5) | 1.0198 | 0.8311 | 1.2621 | 8.54E-01        | 9.71E-01 |
| 135 | PC(P-18:0/22:6) | 1.0669 | 0.8682 | 1.3198 | 5.44E-01        | 8.95E-01 |
| 136 | LPC(14:0)       | 0.8379 | 0.6828 | 1.0285 | 9.05E-02        | 6.94E-01 |
| 137 | LPC(15:0)       | 0.9154 | 0.7426 | 1.1267 | 4.06E-01        | 8.95E-01 |
| 138 | LPC(16:0)       | 1.0697 | 0.8580 | 1.3301 | 5.47E-01        | 8.95E-01 |
| 139 | LPC(16:1)       | 1.0163 | 0.8166 | 1.2647 | 8.85E-01        | 9.79E-01 |
| 140 | LPC(17:0)       | 0.9544 | 0.7690 | 1.1806 | 6.70E-01        | 9.18E-01 |
| 141 | LPC(17:1)       | 0.9317 | 0.7524 | 1.1516 | 5.15E-01        | 8.95E-01 |
| 142 | LPC(18:0)       | 1.0032 | 0.8064 | 1.2443 | 9.77E-01        | 9.97E-01 |
| 143 | LPC(18:1)       | 1.0951 | 0.8819 | 1.3572 | 4.09E-01        | 8.95E-01 |
| 144 | LPC(18:2)       | 1.0482 | 0.8429 | 1.3042 | 6.73E-01        | 9.18E-01 |
| 145 | LPC(18:3)       | 0.9387 | 0.7588 | 1.1643 | 5.62E-01        | 8.95E-01 |
| 146 | LPC(20:0)       | 1.0905 | 0.8839 | 1.3412 | 4.15E-01        | 8.95E-01 |
| 147 | LPC(20:1)       | 1.0736 | 0.8636 | 1.3304 | 5.19E-01        | 8.95E-01 |
| 148 | LPC(20:2)       | 1.0478 | 0.8471 | 1.2919 | 6.64E-01        | 9.17E-01 |
| 149 | LPC(20:3)       | 0.9707 | 0.7811 | 1.2049 | 7.88E-01        | 9.54E-01 |
| 150 | LPC(20:4)       | 0.9997 | 0.8077 | 1.2363 | 9.97E-01        | 9.98E-01 |
| 151 | LPC(20:5)       | 0.9671 | 0.7913 | 1.1838 | 7.45E-01        | 9.42E-01 |
| 152 | LPC(22:0)       | 1.1350 | 0.9066 | 1.4166 | 2.66E-01        | 8.95E-01 |
| 153 | LPC(22:1)       | 1.1005 | 0.9084 | 1.3235 | 3.18E-01        | 8.95E-01 |
| 154 | LPC(22:5)       | 1.0514 | 0.8555 | 1.2870 | 6.31E-01        | 8.95E-01 |
| 155 | LPC(22:6)       | 1.0003 | 0.8164 | 1.2227 | 9.98E-01        | 9.98E-01 |
| 156 | LPC(24:0)       | 1.0916 | 0.8699 | 1.3654 | 4.46E-01        | 8.95E-01 |
| 157 | LPC(26:0)       | 1.0137 | 0.8052 | 1.2774 | 9.08E-01        | 9.82E-01 |
| 158 | LPC(O-16:0)     | 1.0166 | 0.7983 | 1.2902 | 8.93E-01        | 9.81E-01 |
| 159 | LPC(O-18:0)     | 1.0329 | 0.8060 | 1.3201 | 7.97E-01        | 9.54E-01 |
| 160 | LPC(O-18:1)     | 1.0320 | 0.8013 | 1.3268 | 8.06E-01        | 9.62E-01 |
| 161 | LPC(O-20:0)     | 0.9186 | 0.7608 | 1.1024 | 3.69E-01        | 8.95E-01 |
| 162 | LPC(O-20:1)     | 0.9021 | 0.7190 | 1.1280 | 3.70E-01        | 8.95E-01 |
| 163 | LPC(O-22:0)     | 1.0417 | 0.8459 | 1.2775 | 6.98E-01        | 9.28E-01 |
| 164 | LPC(O-22:1)     | 1.0101 | 0.7973 | 1.2753 | 9.33E-01        | 9.87E-01 |
| 165 | LPC(O-24:0)     | 1.0572 | 0.8537 | 1.3100 | 6.10E-01        | 8.95E-01 |
| 166 | LPC(O-24:1)     | 1.0520 | 0.8475 | 1.3007 | 6.43E-01        | 9.01E-01 |
| 167 | LPC(O-24:2)     | 1.0036 | 0.8105 | 1.2389 | 9.74E-01        | 9.97E-01 |
| 168 | PE(16:0_16:0)   | 1.2609 | 0.9996 | 1.5914 | 5.06E-02        | 6.34E-01 |
| 169 | PE(16:0_16:1)   | 1.0916 | 0.8493 | 1.4036 | 4.94E-01        | 8.95E-01 |
| 170 | PE(16:0_18:1)   | 1.3155 | 1.0137 | 1.7142 | <b>4.07E-02</b> | 6.34E-01 |
| 171 | PE(16:0_18:2)   | 1.2657 | 0.9924 | 1.6213 | 5.98E-02        | 6.34E-01 |
| 172 | PE(34:3)        | 1.1260 | 0.8862 | 1.4361 | 3.35E-01        | 8.95E-01 |
| 173 | PE(35:1)        | 1.1719 | 0.9243 | 1.4938 | 1.95E-01        | 8.91E-01 |
| 174 | PE(35:2)        | 1.1837 | 0.9410 | 1.4972 | 1.55E-01        | 8.91E-01 |
| 175 | PE(36:0)        | 1.0358 | 0.8289 | 1.2961 | 7.58E-01        | 9.46E-01 |
| 176 | PE(18:0_18:1)   | 1.2939 | 0.9855 | 1.7092 | 6.66E-02        | 6.34E-01 |
| 177 | PE(36:2)        | 1.2303 | 0.9574 | 1.5912 | 1.10E-01        | 7.85E-01 |
| 178 | PE(36:3)        | 1.1690 | 0.9258 | 1.4822 | 1.93E-01        | 8.91E-01 |
| 179 | PE(16:0_20:4)   | 1.1627 | 0.9249 | 1.4717 | 2.03E-01        | 8.91E-01 |

|     |                 |        |        |        |                 |          |
|-----|-----------------|--------|--------|--------|-----------------|----------|
| 180 | PE(36:5)        | 1.1054 | 0.8915 | 1.3766 | 3.66E-01        | 8.95E-01 |
| 181 | PE(18:0_20:3)   | 1.0606 | 0.8256 | 1.3710 | 6.49E-01        | 9.01E-01 |
| 182 | PE(18:0_20:4)   | 1.1950 | 0.9380 | 1.5348 | 1.56E-01        | 8.91E-01 |
| 183 | PE(38:5)        | 1.1327 | 0.9012 | 1.4326 | 2.92E-01        | 8.95E-01 |
| 184 | PE(16:0_22:6)   | 1.1170 | 0.8927 | 1.4070 | 3.40E-01        | 8.95E-01 |
| 185 | PE(40:4)        | 1.1527 | 0.9131 | 1.4616 | 2.36E-01        | 8.95E-01 |
| 186 | PE(40:5)        | 1.0245 | 0.8059 | 1.3122 | 8.46E-01        | 9.71E-01 |
| 187 | PE(18:0_22:6)   | 1.0993 | 0.8744 | 1.3944 | 4.26E-01        | 8.95E-01 |
| 188 | PE(40:7)        | 1.1083 | 0.9001 | 1.3748 | 3.41E-01        | 8.95E-01 |
| 189 | PE(O-18:0/22:5) | 1.0463 | 0.8515 | 1.2939 | 6.72E-01        | 9.18E-01 |
| 190 | PE(O-36:3)      | 1.1319 | 0.9130 | 1.4067 | 2.61E-01        | 8.95E-01 |
| 191 | PE(O-38:4)      | 1.0920 | 0.8827 | 1.3567 | 4.22E-01        | 8.95E-01 |
| 192 | PE(O-16:0/20:4) | 1.0251 | 0.8345 | 1.2614 | 8.14E-01        | 9.65E-01 |
| 193 | PE(O-38:5)      | 1.0534 | 0.8582 | 1.2983 | 6.22E-01        | 8.95E-01 |
| 194 | PE(O-18:1/22:6) | 1.0615 | 0.8679 | 1.3087 | 5.69E-01        | 8.95E-01 |
| 195 | PE(O-34:1)      | 1.2709 | 1.0183 | 1.5908 | <b>3.52E-02</b> | 6.34E-01 |
| 196 | PE(O-16:0/18:2) | 1.0079 | 0.8202 | 1.2405 | 9.41E-01        | 9.87E-01 |
| 197 | PE(O-36:2)      | 1.2049 | 0.9759 | 1.4933 | 8.57E-02        | 6.74E-01 |
| 198 | PE(O-36:5)      | 0.9600 | 0.7765 | 1.1912 | 7.09E-01        | 9.29E-01 |
| 199 | PE(O-36:6)      | 0.9729 | 0.7927 | 1.1977 | 7.94E-01        | 9.54E-01 |
| 200 | PE(O-18:0/22:6) | 1.0644 | 0.8746 | 1.3069 | 5.43E-01        | 8.95E-01 |
| 201 | PE(P-34:1)      | 1.1724 | 0.9384 | 1.4705 | 1.65E-01        | 8.91E-01 |
| 202 | PE(P-34:2)      | 1.0943 | 0.8881 | 1.3534 | 4.02E-01        | 8.95E-01 |
| 203 | PE(P-36:4)      | 1.0786 | 0.8778 | 1.3303 | 4.75E-01        | 8.95E-01 |
| 204 | PE(P-38:5)      | 1.0300 | 0.8411 | 1.2691 | 7.78E-01        | 9.54E-01 |
| 205 | PE(P-38:6)      | 1.0714 | 0.8762 | 1.3182 | 5.08E-01        | 8.95E-01 |
| 206 | PE(P-36:1)      | 1.2151 | 0.9871 | 1.5023 | 6.90E-02        | 6.34E-01 |
| 207 | PE(P-36:2)      | 1.1813 | 0.9570 | 1.4646 | 1.25E-01        | 8.55E-01 |
| 208 | PE(P-38:4)      | 1.1084 | 0.9014 | 1.3705 | 3.35E-01        | 8.95E-01 |
| 209 | PE(P-40:5)      | 1.1193 | 0.9116 | 1.3870 | 2.92E-01        | 8.95E-01 |
| 210 | PE(P-40:6)      | 1.0861 | 0.8877 | 1.3386 | 4.30E-01        | 8.95E-01 |
| 211 | PE(P-40:4)      | 1.1430 | 0.9326 | 1.4070 | 2.03E-01        | 8.91E-01 |
| 212 | PE(16:0/0:0)    | 1.1381 | 0.8961 | 1.4445 | 2.88E-01        | 8.95E-01 |
| 213 | PE(18:0/0:0)    | 1.1173 | 0.8900 | 1.4000 | 3.37E-01        | 8.95E-01 |
| 214 | PE(18:1/0:0)    | 1.1497 | 0.9181 | 1.4404 | 2.24E-01        | 8.95E-01 |
| 215 | PE(18:2/0:0)    | 1.0830 | 0.8968 | 1.3183 | 4.17E-01        | 8.95E-01 |
| 216 | PE(20:4/0:0)    | 1.0472 | 0.8617 | 1.2813 | 6.48E-01        | 9.01E-01 |
| 217 | PE(22:6/0:0)    | 1.0172 | 0.8289 | 1.2531 | 8.72E-01        | 9.71E-01 |
| 218 | PI(16:0/16:0)   | 0.9755 | 0.7729 | 1.2308 | 8.34E-01        | 9.71E-01 |
| 219 | PI(16:0_16:1)   | 1.0042 | 0.7859 | 1.2819 | 9.73E-01        | 9.97E-01 |
| 220 | PI(34:0)        | 1.0368 | 0.8591 | 1.2605 | 7.11E-01        | 9.29E-01 |
| 221 | PI(34:1)        | 1.0477 | 0.8293 | 1.3238 | 6.96E-01        | 9.28E-01 |
| 222 | PI(18:0_18:1)   | 1.1599 | 0.9236 | 1.4610 | 2.05E-01        | 8.91E-01 |
| 223 | PI(36:2)        | 1.0759 | 0.8550 | 1.3585 | 5.36E-01        | 8.95E-01 |
| 224 | PI(36:3)        | 1.1066 | 0.8713 | 1.4082 | 4.08E-01        | 8.95E-01 |
| 225 | PI(16:0_20:4)   | 1.0650 | 0.8323 | 1.3669 | 6.19E-01        | 8.95E-01 |
| 226 | PI(18:0_20:2)   | 1.1971 | 0.9478 | 1.5198 | 1.35E-01        | 8.74E-01 |
| 227 | PI(18:0_20:3)   | 1.2796 | 0.9980 | 1.6521 | 5.51E-02        | 6.34E-01 |
| 228 | PI(18:0_20:4)   | 1.2303 | 0.9901 | 1.5431 | 6.69E-02        | 6.34E-01 |
| 229 | PI(38:5)        | 1.0093 | 0.8128 | 1.2572 | 9.34E-01        | 9.87E-01 |
| 230 | PI(38:6)        | 0.9602 | 0.7794 | 1.1859 | 7.04E-01        | 9.29E-01 |
| 231 | PI (40:4)       | 1.2260 | 0.9749 | 1.5488 | 8.44E-02        | 6.74E-01 |
| 232 | PI(18:0_22:5)   | 1.0252 | 0.8313 | 1.2691 | 8.17E-01        | 9.65E-01 |
| 233 | PI(18:0_22:6)   | 1.1154 | 0.8995 | 1.3877 | 3.23E-01        | 8.95E-01 |
| 234 | LPI(18:0)       | 1.0397 | 0.7830 | 1.3780 | 7.87E-01        | 9.54E-01 |
| 235 | LPI(18:1)       | 1.1745 | 0.9464 | 1.4567 | 1.44E-01        | 8.78E-01 |
| 236 | LPI(18:2)       | 1.1258 | 0.9053 | 1.3992 | 2.86E-01        | 8.95E-01 |
| 237 | LPI(20:4)       | 1.2351 | 0.9954 | 1.5301 | 5.40E-02        | 6.34E-01 |
| 238 | PG(34:1)        | 1.0186 | 0.7959 | 1.3035 | 8.84E-01        | 9.79E-01 |
| 239 | PG(36:1)        | 1.2304 | 0.9488 | 1.6061 | 1.23E-01        | 8.55E-01 |
| 240 | PG(36:2)        | 0.9537 | 0.7422 | 1.2297 | 7.13E-01        | 9.29E-01 |

|     |               |        |        |        |                 |          |
|-----|---------------|--------|--------|--------|-----------------|----------|
| 241 | COH           | 1.1117 | 0.8769 | 1.4289 | 3.95E-01        | 8.95E-01 |
| 242 | CE(14:0)      | 0.9858 | 0.7800 | 1.2518 | 9.06E-01        | 9.82E-01 |
| 243 | CE(15:0)      | 0.9793 | 0.7924 | 1.2149 | 8.48E-01        | 9.71E-01 |
| 244 | CE(16:0)      | 1.1630 | 0.9085 | 1.5033 | 2.40E-01        | 8.95E-01 |
| 245 | CE(16:1)      | 1.1432 | 0.9012 | 1.4551 | 2.73E-01        | 8.95E-01 |
| 246 | CE(16:2)      | 1.0876 | 0.8594 | 1.3884 | 4.93E-01        | 8.95E-01 |
| 247 | CE(17:0)      | 0.8357 | 0.6728 | 1.0413 | 1.07E-01        | 7.85E-01 |
| 248 | CE(17:1)      | 1.0983 | 0.8790 | 1.3837 | 4.18E-01        | 8.95E-01 |
| 249 | CE(18:0)      | 0.9315 | 0.7426 | 1.1786 | 5.47E-01        | 8.95E-01 |
| 250 | CE(18:1)      | 1.0983 | 0.8790 | 1.3837 | 4.18E-01        | 8.95E-01 |
| 251 | CE(18:2)      | 1.1798 | 0.9292 | 1.5219 | 1.90E-01        | 8.91E-01 |
| 252 | CE(18:3)      | 1.0630 | 0.8370 | 1.3660 | 6.25E-01        | 8.95E-01 |
| 253 | CE(20:1)      | 1.0184 | 0.8230 | 1.2629 | 8.68E-01        | 9.71E-01 |
| 254 | CE(20:2)      | 1.0759 | 0.8575 | 1.3605 | 5.35E-01        | 8.95E-01 |
| 255 | CE(20:3)      | 1.0076 | 0.8078 | 1.2683 | 9.48E-01        | 9.87E-01 |
| 256 | CE(20:4)      | 1.0990 | 0.8822 | 1.3871 | 4.14E-01        | 8.95E-01 |
| 257 | CE(20:5)      | 1.0562 | 0.8644 | 1.3019 | 6.01E-01        | 8.95E-01 |
| 258 | CE(22:0)      | 1.0985 | 0.8656 | 1.3998 | 4.43E-01        | 8.95E-01 |
| 259 | CE(22:1)      | 1.1462 | 0.9343 | 1.4064 | 1.91E-01        | 8.91E-01 |
| 260 | CE(22:4)      | 1.2284 | 0.9840 | 1.5459 | 7.44E-02        | 6.66E-01 |
| 261 | CE(22:5)      | 1.1166 | 0.8898 | 1.4182 | 3.54E-01        | 8.95E-01 |
| 262 | CE(22:6)      | 1.0804 | 0.8788 | 1.3431 | 4.75E-01        | 8.95E-01 |
| 263 | CE(24:0)      | 1.2100 | 0.9359 | 1.5693 | 1.48E-01        | 8.84E-01 |
| 264 | CE(24:1)      | 1.1784 | 0.9291 | 1.5040 | 1.82E-01        | 8.91E-01 |
| 265 | CE(24:4)      | 1.1330 | 0.9142 | 1.4126 | 2.61E-01        | 8.95E-01 |
| 266 | CE(24:5)      | 1.3033 | 1.0525 | 1.6220 | <b>1.64E-02</b> | 4.39E-01 |
| 267 | CE(24:6)      | 1.0681 | 0.8625 | 1.3283 | 5.50E-01        | 8.95E-01 |
| 268 | DG(14:0/16:0) | 0.9598 | 0.7784 | 1.1731 | 6.95E-01        | 9.28E-01 |
| 269 | DG(16:0/16:0) | 1.0002 | 0.8249 | 1.2043 | 9.98E-01        | 9.98E-01 |
| 270 | DG(14:0/18:1) | 1.0287 | 0.7770 | 1.3660 | 8.44E-01        | 9.71E-01 |
| 271 | DG(14:0/18:2) | 0.9243 | 0.7152 | 1.1971 | 5.49E-01        | 8.95E-01 |
| 272 | DG(16:0/18:0) | 0.9782 | 0.8390 | 1.1322 | 7.73E-01        | 9.54E-01 |
| 273 | DG(16:0/18:1) | 1.2575 | 0.9335 | 1.7055 | 1.36E-01        | 8.74E-01 |
| 274 | DG(16:1/18:0) | 1.0887 | 0.8245 | 1.4388 | 5.50E-01        | 8.95E-01 |
| 275 | DG(16:1/18:1) | 1.1550 | 0.8688 | 1.5445 | 3.26E-01        | 8.95E-01 |
| 276 | DG(16:0/18:2) | 1.1686 | 0.8794 | 1.5563 | 2.85E-01        | 8.95E-01 |
| 277 | DG(18:0/18:0) | 0.9512 | 0.7912 | 1.1439 | 5.95E-01        | 8.95E-01 |
| 278 | DG(18:0/18:1) | 1.0766 | 0.8098 | 1.4342 | 6.13E-01        | 8.95E-01 |
| 279 | DG(18:1/18:1) | 1.2378 | 0.9230 | 1.6739 | 1.60E-01        | 8.91E-01 |
| 280 | DG(18:0/18:2) | 1.0841 | 0.8138 | 1.4467 | 5.82E-01        | 8.95E-01 |
| 281 | DG(18:1/18:2) | 1.1394 | 0.8674 | 1.5056 | 3.53E-01        | 8.95E-01 |
| 282 | DG(16:0/20:3) | 1.1015 | 0.8309 | 1.4668 | 5.05E-01        | 8.95E-01 |
| 283 | DG(18:2/18:2) | 1.0136 | 0.7958 | 1.2899 | 9.13E-01        | 9.82E-01 |
| 284 | DG(18:1/18:3) | 1.0729 | 0.8295 | 1.3932 | 5.95E-01        | 8.95E-01 |
| 285 | DG(16:0/20:4) | 1.0795 | 0.8313 | 1.4075 | 5.69E-01        | 8.95E-01 |
| 286 | DG(18:1/20:0) | 1.0316 | 0.8509 | 1.2456 | 7.49E-01        | 9.42E-01 |
| 287 | DG(18:1/20:3) | 1.0983 | 0.8616 | 1.4063 | 4.53E-01        | 8.95E-01 |
| 288 | DG(18:0/20:4) | 1.1129 | 0.8772 | 1.4134 | 3.80E-01        | 8.95E-01 |
| 289 | DG(18:1/20:4) | 1.0358 | 0.8174 | 1.3190 | 7.73E-01        | 9.54E-01 |
| 290 | DG(16:0/22:5) | 1.0957 | 0.8829 | 1.3771 | 4.20E-01        | 8.95E-01 |
| 291 | DG(16:0/22:6) | 1.0717 | 0.8578 | 1.3431 | 5.45E-01        | 8.95E-01 |
| 292 | TG(48:0)      | 1.0492 | 0.8092 | 1.3587 | 7.16E-01        | 9.30E-01 |
| 293 | TG(48:1)      | 1.0029 | 0.7782 | 1.2987 | 9.82E-01        | 9.97E-01 |
| 294 | TG(48:2)      | 1.0230 | 0.7905 | 1.3313 | 8.64E-01        | 9.71E-01 |
| 295 | TG(48:3)      | 1.0139 | 0.7902 | 1.3062 | 9.14E-01        | 9.82E-01 |
| 296 | TG(49:1)      | 0.9594 | 0.7556 | 1.2227 | 7.35E-01        | 9.42E-01 |
| 297 | TG(50:0)      | 1.0232 | 0.7793 | 1.3420 | 8.69E-01        | 9.71E-01 |
| 298 | TG(50:1)      | 1.1047 | 0.8573 | 1.4322 | 4.47E-01        | 8.95E-01 |
| 299 | TG(50:2)      | 1.1750 | 0.9122 | 1.5288 | 2.21E-01        | 8.95E-01 |
| 300 | TG(50:3)      | 1.0852 | 0.8437 | 1.4140 | 5.35E-01        | 8.95E-01 |
| 301 | TG(50:4)      | 1.0657 | 0.8336 | 1.3779 | 6.19E-01        | 8.95E-01 |

|     |          |        |        |        |          |          |
|-----|----------|--------|--------|--------|----------|----------|
| 302 | TG(51:1) | 1.0286 | 0.8004 | 1.3303 | 8.28E-01 | 9.71E-01 |
| 303 | TG(51:2) | 1.0415 | 0.8206 | 1.3328 | 7.42E-01 | 9.42E-01 |
| 304 | TG(52:1) | 1.1304 | 0.8605 | 1.4981 | 3.86E-01 | 8.95E-01 |
| 305 | TG(52:2) | 1.1771 | 0.9274 | 1.5128 | 1.92E-01 | 8.91E-01 |
| 306 | TG(52:3) | 1.1170 | 0.8877 | 1.4211 | 3.57E-01 | 8.95E-01 |
| 307 | TG(52:4) | 1.1682 | 0.9197 | 1.4975 | 2.11E-01 | 8.95E-01 |
| 308 | TG(53:2) | 1.0410 | 0.8239 | 1.3272 | 7.41E-01 | 9.42E-01 |
| 309 | TG(54:0) | 0.9776 | 0.8073 | 1.1879 | 8.18E-01 | 9.65E-01 |
| 310 | TG(54:1) | 1.1567 | 0.8874 | 1.5107 | 2.83E-01 | 8.95E-01 |
| 311 | TG(54:2) | 1.2817 | 0.9876 | 1.6781 | 6.66E-02 | 6.34E-01 |
| 312 | TG(54:3) | 1.1407 | 0.9162 | 1.4274 | 2.44E-01 | 8.95E-01 |
| 313 | TG(54:4) | 1.1583 | 0.9221 | 1.4633 | 2.12E-01 | 8.95E-01 |
| 314 | TG(54:5) | 1.1604 | 0.9199 | 1.4726 | 2.15E-01 | 8.95E-01 |
| 315 | TG(54:6) | 1.1032 | 0.8738 | 1.4005 | 4.14E-01 | 8.95E-01 |
| 316 | TG(56:6) | 1.0968 | 0.8776 | 1.3824 | 4.25E-01 | 8.95E-01 |

---

**Supplementary Table 6.** Coefficients and p-values of a logistic regression model to detect AF

|                   | <b>Coefficient</b> | <b>Odds Ratio</b> | <b>lower CI</b> | <b>upper CI</b> | <b>P-value</b>  |
|-------------------|--------------------|-------------------|-----------------|-----------------|-----------------|
| (Intercept)       | -9.155             | 0.0001            | 0.00001         | 0.00147         | 1.12E-11        |
| Q_WAVES           | 0.061              | 1.0634            | 0.77524         | 1.43692         | 6.96E-01        |
| Antihypertensive  | 0.920              | 2.5099            | 1.76694         | 3.67343         | 7.66E-07        |
| SBP               | -0.003             | 0.9968            | 0.99025         | 1.00321         | 3.26E-01        |
| DBP               | 0.010              | 1.0097            | 0.99692         | 1.02265         | 1.36E-01        |
| HF                | 1.489              | 4.4325            | 3.13331         | 6.22546         | 1.67E-17        |
| smoking           | -0.175             | 0.8397            | 0.59119         | 1.16828         | 3.14E-01        |
| AGE               | 0.050              | 1.0510            | 1.03252         | 1.06981         | 3.93E-08        |
| WEIGHT            | 0.008              | 1.0081            | 1.00052         | 1.01557         | 3.40E-02        |
| HEIGHT            | 0.013              | 1.0127            | 0.99971         | 1.02600         | 5.59E-02        |
| <b>TRIGLYC</b>    | -0.084             | 0.9193            | 0.81818         | 1.02296         | <b>1.40E-01</b> |
| <b>HDL_CHOL</b>   | -0.239             | 0.7875            | 0.54236         | 1.08592         | <b>1.87E-01</b> |
| <b>TOTAL_CHOL</b> | 0.020              | 1.0199            | 0.91415         | 1.13266         | <b>7.20E-01</b> |
